# 1 Unusual evolution of tree frog populations in the Chernobyl 2 exclusion zone

3 Clément Car<sup>1\*</sup>, André Gilles<sup>2</sup>, Olivier Armant<sup>1</sup>, Pablo Burraco<sup>3,4</sup>, Karine Beaugelin-Seiller<sup>1</sup>,  
4 Sergey Gashchak<sup>5</sup>, Virginie Camilleri<sup>1</sup>, Isabelle Cavalie<sup>1</sup>, Patrick Laloi<sup>1</sup>, Christelle Adam-  
5 Guillermin<sup>6</sup>, Germán Orizaola<sup>7,8</sup> and Jean-Marc Bonzom<sup>1\*</sup>

6 <sup>1</sup> Institut de Radioprotection et de Sûreté Nucléaire (IRSN), PSE-ENV/SRTE/LECO,  
7 Cadarache, 13115, Saint Paul Lez Durance, France

8 <sup>2</sup> UMR RECOVER, Aix-Marseille Université, INRAE, centre Saint-Charles, 3 place Victor  
9 Hugo, 13331 Marseille, France

10 <sup>3</sup> Animal Ecology, Department of Ecology and Genetics, Evolutionary Biology Centre,  
11 Uppsala University, Norbyvägen 18D, SE-75236 Uppsala, Sweden

12 <sup>4</sup> Institute of Biodiversity, Animal Health and Comparative Medicine, College of Medical,  
13 Veterinary and Life Sciences, University of Glasgow, Glasgow G12 8QQ, United Kingdom

14 <sup>5</sup> Chernobyl Center for Nuclear Safety, Radioactive Waste and Radioecology, 07100,  
15 Slavutych, Ukraine

16 <sup>6</sup> Institut de Radioprotection et de Sûreté Nucléaire (IRSN), PSE-SANTE/SDOS/LMDN,  
17 Cadarache, 13115, Saint Paul Lez Durance, France

18 <sup>7</sup> IMIB-Biodiversity Research Institute (Univ. Oviedo-CSIC-Princip. Asturias), Universidad  
19 de Oviedo, Campus de Mieres, Edificio de Investigación 5<sup>a</sup> planta, c/ Gonzalo Gutiérrez  
20 Quirós s/n, 33600 Mieres-Asturias, Spain

21 <sup>8</sup> Zoology Unit, Department Biology Organisms and Systems, University of Oviedo, c/  
22 Catedrático Rodrigo Uría s/n, 33071 Oviedo-Asturias, Spain

23

24

25

## 26 **Abstract**

27 Despite the ubiquity of pollutants in the environment, their long-term ecological  
28 consequences are not always clear and still poorly studied. This is the case concerning the  
29 radioactive contamination of the environment following the major nuclear accident at the  
30 Chernobyl nuclear power plant. Notwithstanding the implications of evolutionary processes  
31 on the population status, few studies concern the evolution of organisms chronically exposed  
32 to ionizing radiation in the Chernobyl exclusion zone. Here, we examined genetic markers for  
33 19 populations of Eastern tree frog (*Hyla orientalis*) sampled in the Chernobyl region about

34 thirty years after the nuclear power plant accident to investigate microevolutionary processes  
35 ongoing in local populations. Genetic diversity estimated from nuclear and mitochondrial  
36 markers showed an absence of genetic erosion and higher mitochondrial diversity in tree frogs  
37 from the Chernobyl exclusion zone compared to other European populations. Moreover, the  
38 study of haplotype network permitted us to decipher the presence of an independent recent  
39 evolutionary history of Chernobyl exclusion zone's Eastern tree frogs caused by an elevated  
40 mutation rate compared to other European populations. By fitting to our data a model of  
41 haplotype network evolution, we suspected that Eastern tree frog populations in the  
42 Chernobyl exclusion zone have a high mitochondrial mutation rate and small effective  
43 population sizes. These data suggest that Eastern tree frogs populations might offset the  
44 impact of deleterious mutations because of their large clutch size, but also question the long  
45 term impact of ionizing radiation on the status of other species living in the Chernobyl  
46 exclusion zone.

## 47 **Introduction**

48 The loss of biodiversity during the past 50 years is unprecedented in human history. Pollution,  
49 as part of the major drivers of biodiversity loss (namely habitat and climate change, pollution,  
50 overexploitation of natural resources, and invasive species), has severely altered many  
51 ecosystems<sup>1</sup>. Among the large diversity of pollutants, radioactive contamination caused by  
52 human activities, and the associated risks for ecosystems and humans, are the subject of broad  
53 societal and scientific concern<sup>2</sup>. This is particularly true in the case of major nuclear accident  
54 such as the one occurred at the Chernobyl nuclear power plant (NPP) on April 1986<sup>3,4</sup>.

55 Although the short-term adverse effects of high ionizing radiation doses on wildlife following  
56 this accident are not questioned<sup>5-7</sup>, there are still many unknowns and controversies on the  
57 long-term ecological consequences of these radioactive releases<sup>8-11</sup>.

58 One of the biggest challenges for an accurate estimation of the impact of chronic pollution on  
59 ecosystems, is to understand, quantify and predict its effects not only at individual, but also at  
60 population level<sup>12-14</sup>. Understanding the impact of pollutants on populations allows to  
61 investigate evolutionary processes that may affect population status and their capacity to  
62 persist in the future. Several studies in the Chernobyl area have estimated the abundance and  
63 interspecific diversity of wildlife after the accident<sup>15-29</sup>. However, these studies have  
64 provided inconclusive, and often divergent results, dependent on the sampling design (e.g.  
65 for mammals<sup>17,23,30</sup>). In addition, studies investigating the evolution of wildlife in Chernobyl  
66 area are scarce, and have not provide solid conclusions<sup>31,32</sup>. In order to increase our  
67 understanding on the impact of ionizing radiation on wildlife in the Chernobyl area, we must  
68 examine intraspecific genetic variations. Examining genetic variations within and between  
69 populations may allow to estimate differences in the intensity of possible evolutionary  
70 processes occurring in wildlife populations<sup>33-36</sup>. Evolutionary processes (mutation, migration,  
71 genetic drift, selection) must be understood as the mechanisms at the origin of the

72 modification of genetic variations within populations. Genetic diversity indices, in particular,  
73 can be highly informative from an ecological perspective since changes in genetic diversity  
74 can affect the capacity of populations to cope with environmental change<sup>37-41</sup>.

75 Populations exposed to pollutants often experience genetic erosion<sup>35</sup>. Two processes can be at  
76 the origin of this decreased diversity: a directional selective pressure which can be driven by  
77 the modification of the environment<sup>36,42</sup>, and/or a demographic bottleneck involving the  
78 fixation of polymorphic alleles with neutral drift<sup>38,43-45</sup>. Most of the population genetic studies  
79 carried out in the Chernobyl area have been conducted on the bank vole *Myodes glareolus*,  
80 and showed increased genetic diversity in highly radio-contaminated areas<sup>46-51</sup>. There are two  
81 not mutually exclusive explanations for this observation. First, exposure to radioactive  
82 pollution can lead to an increased mutation rate<sup>47,52,53</sup>, which can partially offset the genetic  
83 diversity loss caused by population bottlenecks. Alternatively, the Chernobyl exclusion zone  
84 (CEZ) - which is an area established soon after the Chernobyl nuclear disaster where human  
85 population was evacuated<sup>54</sup> - could act as an ecological sink<sup>55-58</sup>: a demographic deficit  
86 caused by the polluted habitat (mortality > natality) could lead to immigration to these  
87 habitats, and *in fine* to an increase in genetic diversity<sup>49,59,60</sup>.

88 Here, we examine the relationship between radionuclide contamination in the CEZ and the  
89 genetic pattern of populations of a lissamphibian species, the Eastern tree frog (*Hyla*  
90 *orientalis*)<sup>61</sup> Bedriaga 1890 (Anura, Hylidae). The phylogeography of this species is well  
91 understood which allows the examination of Chernobyl populations in the context of the  
92 general evolutionary history of the species<sup>62</sup>. In addition, the Eastern tree frog may be  
93 significantly exposed to ionizing radiation in both aquatic and terrestrial environments at  
94 susceptible stages of its development, especially during the metamorphosis and during its  
95 hibernation in the contaminated soil<sup>63,64</sup>.

96 We studied population genetics from 19 populations of *H. orientalis* sampled about thirty  
97 years after the Chernobyl NPP accident at sites located across a wide range of radioactive  
98 contamination inside and outside the CEZ (Fig. 1.b). We used mitochondrial and nuclear  
99 genetic markers. These markers differ in their mode of transmission, rate of evolution, and  
100 dynamics against environmental disturbances<sup>65-67</sup>. Genetic diversity of populations from the  
101 CEZ was compared to that of populations distant up to 40 km from the CEZ (Slavutych), as  
102 well as to five other European populations belonging to the same clade<sup>62</sup> (Fig. 1a). Finally, we  
103 studied the mitochondrial haplotype network and made simulation of networks over 10 and 15  
104 generations in order to estimate the population parameters of frogs living in the CEZ since the  
105 accident.

106

## 107 **Results**

108 **Mitochondrial DNA heteroplasmies.** Based on the analysis of the mitochondrial DNA  
109 (mtDNA) of 216 Eastern tree frogs *Hyla orientalis* sampled in the CEZ and at Slavutych, we  
110 observed 20 substitutions composed of 19 transitions (12 C/T and 7 A/G) and 1 transversion  
111 (A/T) (Supplementary Tables 1 and 2). By comparing the haplotypes found in the Chernobyl  
112 region with the haplogroups described for other areas of Europe<sup>61,62</sup>, we determined that they  
113 were part of the clade D4, characteristic of areas from the northern Black Sea shores to the  
114 Baltic Sea. In addition, we detected seven individuals from three populations with two  
115 different haplotypes in the CEZ which we considered as being cases of heteroplasmy, while  
116 none were detected in the other European populations (see Methods, Supplementary Fig. 1  
117 and Supplementary Table 3).

118

119 **High mitochondrial genetic diversity for CEZ populations.** We compared the genetic

120 diversity of populations with sufficient sample size ( $n \geq 7$  individuals) sampled in the CEZ to  
121 the populations from Slavutych and to those from other European areas sampled by Dufresnes  
122 et al.<sup>62</sup>. Mitochondrial haplotypic and nucleotide diversities of all populations from CEZ ( $h =$   
123  $0.7308$ ,  $\pi = 0.0024$ ) were significantly higher ( $W = 91$ ,  $p < 0.005$ ) than those of other  
124 European populations ( $h = 0.6071$ ,  $\pi = 0.0008$ ) (Fig. 2a and Supplementary Table 4). The  
125 lowest mitochondrial haplotype diversity was measured for the populations nearest to  
126 Chernobyl region, in Kharkiv, Ukraine ( $h = 0.2500$ ) and Luninets, Belarus ( $h = 0$ ) (Figure 1a  
127 and Figure 2b). The two Slavutych populations present an intermediate mitochondrial  
128 haplotype diversity, as the H18 population had low genetic diversity ( $h = 0.2857$ ), while the  
129 G18 population had a genetic diversity fairly close to the genetic diversity of the CEZ  
130 populations ( $h = 0.6444$ ) (Fig. 2b). To compare the variations of mtDNA to nuclear DNA  
131 (nDNA) we examined 21 nuclear microsatellites from 126 individuals captured in 2016 and  
132 2017 (Supplementary Table 8). Unlike mtDNA, all the indices of estimated nuclear genetic  
133 diversity, such as the genetic diversity within populations (HS) (Fig. 2c), showed no  
134 significant differences between the CEZ populations and the other European populations  
135 (Supplementary Table 5).

136 We also investigated the relationship between genetic diversity and the average total  
137 dose rates (ATDRs) of ionizing radiation absorbed by individuals in each population of the  
138 Chernobyl region (both inside CEZ and around Slavutych; Fig. 1b, see Methods). ATDRs  
139 were estimated to provide a more accurate description of the exposure of populations to  
140 ionizing radiation than the generally used ambient dose rate, by taking into account the  
141 contribution of the different radionuclides and radiation types (alpha, beta and gamma  
142 emitters) from all exposure pathways (internal and external) (See Giraudeau et al.<sup>63,68</sup> as well  
143 as Methods and Supplementary note 1). Only mitochondrial nucleotide diversity was  
144 significantly positively correlated to ATDRs ( $S = 294$ ,  $\rho = 0.640$ ,  $p = 0.007$ ) (Fig. 3a and

145 Supplementary Table 6). In contrast, the correlation between mitochondrial haplotype  
146 diversity and ATDR was not significant ( $S = 658$ ,  $\rho = 0.193$ ,  $p = 0.455$ ; Fig. 3b). Genetic  
147 diversity in nuclear microsatellites was not significantly correlated with ATDRs, although  
148 these parameters showed a non-significant negative correlation ( $S = 194$ ,  $\rho = -0.617$ ,  $p =$   
149  $0.086$ ; Fig. 3c). Only private allelic richness and ATDRs were significantly negatively  
150 correlated ( $S = 221.13$ ,  $\rho = -0.843$ ,  $p = 0.004$ ) (Supplementary Table 7).

151

152 **Local geographical structure of genetic variation.** In order to study the genetic structure of  
153 populations sampled in the CEZ and the Slavutych area, we used a pairwise genetic  
154 differentiation estimator between populations (pairwise  $F_{st}$ )<sup>69</sup>. Unlike the low differentiation  
155 estimated with nuclear microsatellites ( $-0.031 < F_{st} < 0.093$ ), differentiation estimated from  
156 cytochrome b sequences was relatively high ( $-0.173 < F_{st} < 0.426$ ). The highest genetic  
157 differentiations for mitochondrial marker (cytochrome b) were observed between the South  
158 West A17 and North D18 populations, and other populations ( $0.072 < F_{st} < 0.426$ , Fig. 4a).  
159 Slavutych populations were also highly genetically differentiated from CEZ populations  
160 ( $0.095 < F_{st} < 0.395$ ). Genetic pairwise differentiations estimated on nuclear markers were  
161 similar to those estimated on mitochondrial markers, the most differentiated population being  
162 A17 ( $0.021 < F_{st} < 0.093$ , Fig. 4b). Despite the absence of a complete similarity between  
163 geographical and genetic structures (Figs. 1b and 4a,b), the genetically closest populations  
164 were, as expected, usually the geographically closest populations. This similarity was obvious  
165 when separating populations in Neighbour Joining (NJ) trees build for each sampling year  
166 (Supplementary Fig. 2).

167 We examine the effects of year of sampling, and sampling site on the distribution of  
168 mitochondrial genetic structure, using Analysis of Molecular Variance (AMOVA). We used  
169 three year groups (2016, 2017, 2018), and three geographical areas corresponding to three

170 groups of populations in the Chernobyl region: one in the North close to the NPP, one on the  
171 South of the exclusion zone, and one including the Slavutych populations (Fig. 4c). In both  
172 cases, the highest variance was observed within populations (83.75% and 79.85%). However,  
173 the inter-group variance based on years was not significant (2.00%,  $p > 0.05$ ), in opposition to  
174 the variance based on geographical regions (12.27%,  $p < 0.001$ ).

175 In order to test if the increase of genetic distance between populations was shaped by  
176 their geographic distances (“isolation by distance” hypothesis), we run Mantel test<sup>70</sup> between  
177 pairwise genetic distances matrix estimated from Fst and pairwise geographic distances  
178 matrix. Isolation by distance was significant for both nuclear ( $r = 0.4453$ ,  $p = 0.005$ ), and  
179 mitochondrial markers ( $r = 0.3461$ ,  $p = 0.009$ ). The correspondence between nuclear and  
180 mitochondrial genetic distances described from NJ trees was also significant ( $r = 0.6627$ ,  $p =$   
181  $0.003$ ). Because of a possible link between geography and radionuclide contamination<sup>71</sup>, we  
182 also tested if isolation by distance was carried by the ATDRs using a partial Mantel test. The  
183 correlation between genetic distances and geographic distances could not be explained by the  
184 differences of ATDRs (mtDNA:  $r = 0.3474$ ,  $sign = 0.007$ ; nDNA:  $r = 0.4452$ ,  $sign = 0.006$ ).  
185 These results indicate that the local genetic structure was mainly influenced by geography, but  
186 not by years of sampling or levels of radiation exposure.

187

188 **Haplotype networks and CEZ independent evolutionary processes.** Following the first  
189 quantitative part of our study, we then focused on cytochrome b mitochondrial marker as it  
190 allowed us studying qualitatively haplotypes of all populations (i.e. CEZ, Slavutych, and  
191 populations outside Chernobyl region sampled by Dufresnes et al.<sup>62</sup>; see Fig. 1a), and  
192 examined their genealogical links within a network of haplotypes. This approach is a good  
193 way to situate populations within an evolutionary context and explore more subtle  
194 evolutionary processes than with diversity indices only<sup>56</sup>. By comparing the haplotype



195 network of the Chernobyl populations (CEZ and Slavutych areas) with the haplotypes of  
196 populations outside the Chernobyl region, we identified a single haplotype common to all  
197 populations, the central haplotype (Fig. 5). Because of the star-like distribution of the  
198 haplotype network of populations outside the Chernobyl region (in blue, Fig. 5) with respect  
199 to this central haplotype, we considered it as the ancestral haplotype.

200 We detected a discrepancy between the structure of the CEZ haplotype network and  
201 those of all other populations, since the population sampled in Slavutych segregated similarly  
202 to populations from other European areas analysed by Dufresnes et al.<sup>62</sup>: the largest haplotype  
203 was the central haplotype, surrounded by many one substitution step rare haplotypes (Fig. 5;  
204 green and blue). These populations outside the CEZ are in demographic expansion, as  
205 confirmed by the rejection of the equilibrium mutation/drift hypothesis ( $D$  Tajima = -2.2180,  
206  $p < 0.01$ ; Fu and Li  $D^* = -4.4028$ ,  $p = 0.002$ ;  $R_2 = 0.0289$ ,  $p = 0.001$ ). In contrast, the CEZ  
207 populations present a different pattern represented by haplotypes at one and two steps from  
208 the central haplotype, shared by many individuals (Fig. 5, in red), and these populations are  
209 not in demographic expansion ( $D$  Tajima = -0.5641,  $p = 0.332$ ; Fu and Li  $D^* = -1.4653$ ,  $p =$   
210  $0.089$ ;  $R_2 = 0.0663$ ,  $p = 0.357$ ). These results suggested an independent evolutionary history  
211 of the CEZ populations compared to other sampled populations, even in the neighbour  
212 population of Slavutych.

213

214 **Small populations and elevated mutation rate in the CEZ.** To decipher the factors shaping  
215 the particular pattern of the CEZ haplotype network, we simulated the evolution of its  
216 mitochondrial haplotype network using a range of parameters, starting with mitochondrial  
217 haplotype diversity of Slavutych populations, corresponding to the G18 or H18 haplotype  
218 frequencies (see Methods and Supplementary note 2). Simulations were made for different  
219 prior parameters and a set of statistics was chosen to describe the haplotype network at the

220 10<sup>th</sup> and 15<sup>th</sup> generation, corresponding to a generation time of three and two years,  
221 respectively. During a first simulation part, haplotype networks were simulated based on a  
222 fluctuating population size since the accident in the range of uniform distribution U(1000-  
223 5000) and a classical rate of nucleotide substitution in mitochondrial DNA for amphibians of  
224  $20.37 \times 10^{-9}$  per nucleotide per generation<sup>72</sup> (Supplementary Table 12). The Principal  
225 Component Analysis (PCA) was used to compare simulated and observed statistics, and  
226 showed that simulated haplotype networks did not match the observed one, the closest  
227 Euclidean distance being 11.13, indicating that the diversity of CEZ populations cannot be  
228 obtained with this first set of parameters (Fig. 6a.c and Supplementary Fig. 7).

229 In a second simulation of haplotype networks we used smaller population sizes (three  
230 modalities of uniform distribution: U(50,100), U(100,200) and U(200,300)) and high  
231 nucleotide substitution rates (six modalities: 0.005, 0.01, 0.02, 0.04, 0.06, 0.08 per haplotype  
232 per generation in an infinite model site) (Supplementary Table 13). In contrast to the first  
233 simulation, PCA displayed a match between the haplotype networks statistics of the simulated  
234 and observed data. Indeed, the observed data was in the space of simulated data based on the  
235 two first principal components supporting around 90% of variance (Fig. 6b). Posterior  
236 parameters were then estimated using a Ward hierarchical cluster analysis on Euclidean  
237 distance selecting the 5<sup>th</sup> percentile of the simulated descriptive statistics closest to the  
238 observed descriptive statistics (Supplementary Fig. 8). The closest distance was 0.52 and the  
239 median of descriptive statistics for the 5 percentile closest simulated values presented  
240 important similarity with observed values (Supplementary Fig. 9). Considering the posterior  
241 parameters estimated, the diversity of CEZ populations and the particular haplotype network  
242 (Fig. 6d) for the studied mitochondrial marker can thus be obtained in 15 generations with a  
243 small population ( $N_{\max} = 100$ ) and a high nucleotide substitution rate of 0.04 per haplotype  
244 per generation.

245 **Discussion**

246

247 Several studies have shown that in the CEZ, where all residents have been evacuated, large  
248 mammals in particular are reappearing doubtless due to a decrease of human disturbance to  
249 wildlife<sup>17,19,20,28</sup>. Conversely, other studies have shown a decrease in the abundance of some  
250 species in the CEZ (birds<sup>73</sup>, insects<sup>21</sup>, mammals<sup>23</sup>). There is still no consensus about the long  
251 term consequences of the Chernobyl NPP accident, and the effects of exposure to ionizing  
252 radiation on population status remain mostly unknown. To date very few studies have focused  
253 on the evolutionary processes occurring in natural populations that underwent chronic  
254 exposure since the 1986 Chernobyl NPP accident. To the best of our knowledge, our study is  
255 the first in the Chernobyl region (i) investigating the evolutionary processes of CEZ  
256 populations, in comparison to the global European evolution of the closest lineage to which  
257 they belong, (ii) using both qualitative and quantitative mitochondrial genetic information and  
258 quantitative nuclear genetic information to estimate the best evolutionary scenario responsible  
259 of the observed pattern.

260 **A higher mtDNA diversity in the CEZ driven by mutation process.** In contrast to the  
261 expected genetic erosion induced by wildlife exposure to a pollutant<sup>35</sup>, our results did not  
262 show a genetic bottleneck of *H. orientalis* populations in the CEZ compared to the other  
263 European populations studied by Dufresnes et al.<sup>62</sup>. We found a higher mitochondrial genetic  
264 diversity for the populations in the CEZ, while similar nuclear genetic diversity was observed  
265 between CEZ populations and other European populations. These results on mitochondrial  
266 diversity agree with the increased mitochondrial genetic diversity observed on bank voles,  
267 *Myodes glareolus*, from the most contaminated areas of the CEZ<sup>47</sup>. A higher diversity can be  
268 explained by two evolutionary processes: migrations from multiple distinct and distant  
269 populations, or a local higher mutation rate. The discrepancy between nuclear and

270 mitochondrial markers may orienting towards one of these two mechanisms<sup>74,75</sup>. Indeed repair  
271 mechanisms in mtDNA are usually considered less effective than in nDNA<sup>76,77</sup> notably  
272 because of variations in replication mechanism (i.e. low fidelity of the DNA polymerase  $\gamma$ )  
273 and a higher number of genome replications per generation especially during oocyte  
274 maturation<sup>78</sup>. Thus, the emergence of a mutagenic factor in the environment can induce  
275 mutations on mtDNA without increasing nDNA mutations at the same rate. A high migration  
276 rate of animals towards the CEZ would increase both mitochondrial and nuclear diversity, a  
277 pattern that does not corresponds with our observations. Hence, an increased mutation rate in  
278 the CEZ is the most likely explanation to the local genetic novelty and increased genetic  
279 diversity for mtDNA and not for nDNA.

280 **A genetic structure consistent with a higher mutation rate in the CEZ.** Mitochondrial and  
281 nuclear markers differ also in their range of differentiations between populations, but not in  
282 the relative structure of these populations. Indeed, based on pairwise  $F_{st}$  values, the most  
283 differentiated populations using mtDNA markers are highly differentiated ( $> 0.4$ ), but not  
284 when using nDNA ( $< 0.1$ ). The general structure of these populations is quite similar within  
285 the CEZ between mitochondrial and nuclear markers (Fig. 4a.b), and for the two type of  
286 markers, isolation by distance is not rejected. In amphibians, dispersion is usually male-biased  
287 (reviewed by <sup>79</sup>, but see<sup>80</sup>). Since mtDNA is transmitted by females, in case of a strong  
288 migration process, there would have been a discrepancy between the relative nuclear and  
289 mitochondrial population genetic structure. These results, thus, confirm the absence of a  
290 strong tree frog migration process coming from outside the CEZ, and reaffirm the role of  
291 mutation processes occurring on mtDNA. The presence of mitochondrial haplotypes  
292 exclusive to the CEZ – in contrast to previous studies on bank voles<sup>81</sup> – and the absence in the  
293 Chernobyl region of haplotypes shared with populations outside the Chernobyl region (except  
294 ancestral haplotype), support also the hypothesis of absence of numerous long migration

295 between CEZ and other areas. In this way, the mutation/drift balance explains the higher  
296 differentiation found in mtDNA population structure.

297 **Substitution rate and population size at the origin of a “refugia-like” population.** The  
298 mitochondrial haplotype network of the CEZ tree frog populations, showed a striking  
299 structure that differs from what can be expected from the global demographic expansion of  
300 the clade D4<sup>61,62</sup>. This structure is similar to an ancient diversified population,  
301 demographically stable even during the last glacial maximum<sup>82,83</sup>. However, it is unlikely that  
302 the Chernobyl region would have acted as a refuge zone regarding the global evolutionary  
303 history of the *Hyla orientalis* species<sup>62</sup> and the possible recent impact just after the 1986  
304 Chernobyl nuclear accident on amphibians<sup>5,84</sup>. The results of our simulation suggest that a  
305 strong mutation rate coupled with populations of small sizes might be responsible for the  
306 establishment of the CEZ haplotype network structure. Our haplotype network simulation  
307 obtained the observed CEZ haplotype network pattern in 30 years from control local  
308 populations identifying two important parameters, a strong nucleotide substitution per  
309 haplotype per generation of 0.04 and populations of small effective size inferior to 100  
310 individuals (Fig. 6). We noticed a better match between the observed network and the  
311 simulated network after 15 generations than after 10 generations. Although *H. orientalis*  
312 females usually start to breed at 3-year age<sup>85,86</sup> (i.e. 10 generations from the accident), in the  
313 CEZ, female tree frogs may start to breed at 2-year age in order to speed up life-history  
314 strategy. A shorter generation time may be an adaptive response to cope with the  
315 accumulation of damage in stressful environments<sup>87,88</sup>, as those with radioactive  
316 contamination.

317 **Is ionizing radiation at the origin of an increased substitution rate in the CEZ?** The  
318 mitochondrial evolutionary pattern of the CEZ populations, which seems to be the result of a  
319 dynamic comparable to an accelerated evolution, is not observed outside the CEZ.

320 Slavutych's tree frog populations that are geographically close to the CEZ populations do not  
321 show the same haplotype structure and did not present any case of heteroplasmy, contrary to  
322 the CEZ populations. Knowing the mutagenic ability of ionizing radiation<sup>89</sup>, it seems highly  
323 likely that the increase of mitochondrial substitution rate by several hundreds of times  
324 compared to the mitochondrial substitution rate normally observed in amphibians have been  
325 caused by ionizing radiation. Nevertheless, this study does not allow specifying exactly the  
326 relationship between the artificial radionuclides exposure and the evolutionary processes  
327 estimated from genetic variations. The positive correlation between mitochondrial nucleotide  
328 diversity and ATDRs (currently ranging in the frogs samples at the CEZ from 0.007 to 22.4  
329  $\mu\text{Gy}\cdot\text{h}^{-1}$ ) is in agreement with an effect of ionizing radiation on genetic diversity, but there is  
330 no significant correlation between mitochondrial haplotype genetic diversity and ATDRs  
331 contrary to the results of Baker et al. on bank voles between haplotype genetic diversity and  
332 ambient dose rate<sup>47</sup>. The ATDR seems to be the most relevant dose rate estimator for a  
333 population over a time period, but it does not account for exposure of previous generations  
334 that occurred since the accident, even though possible transgenerational effects<sup>90-92</sup> and  
335 evolutionary processes should be dependant of these historical doses. The measured  
336 mitochondrial substitutions may not only be caused by current exposure to artificial  
337 radionuclides, but may be also the result of mutations accumulated by individuals exposed to  
338 ionizing radiation in previous generations. There is no information on local tree frog  
339 population genetics before the accident and, thus, we cannot exclude uncertainties on the  
340 determination of the magnitude of the genetic modifications even if the use of Slavutych  
341 populations as a proxy of ancestral populations appears consistent. To fully understand the  
342 implication of ionizing radiation on the modification of the intensity of evolutionary  
343 processes, it should be valuable to compare these results with similar studies conducted in  
344 other radiocontaminated places like the Fukushima prefecture in Japan.

345 **The key role of mitochondrial DNA in evolutionary ecotoxicology.** Our results show that  
346 the visible higher genetic diversity may not correspond to a classical evolutionary scenario  
347 (i.e. an ancestral population), and that mitochondrial markers are useful to assess the  
348 mutagenic effect of ionizing radiation<sup>93</sup>. Previous studies (e.g. Fuller et al.<sup>94</sup>) did not find any  
349 significant positive correlation between absorbed radiation (ATDRs ranging from 0.064 to  
350 26.4  $\mu\text{Gy}\cdot\text{h}^{-1}$ ) and nuclear genetic diversity in the freshwater crustacean *Asellus aquaticus*  
351 from the Chernobyl region. This study concludes that the exposure to ionizing radiation has  
352 not significantly influenced genetic diversity in *A. aquaticus* in the Chernobyl area. The  
353 analyses of mitochondrial markers might have provide other complementary information  
354 pointing towards a mutation process as showed in our study on *H. orientalis*. Measuring  
355 mitochondrial markers is thus important as a tool for estimate the modification of the intensity  
356 of evolutionary process, but also because of the probable consequences of mitochondrial  
357 mutations on individuals and populations. In humans, mtDNA mutations are responsible of  
358 several mitochondrial diseases like optic neuropathy<sup>95</sup>, MELAS<sup>96</sup> and MERRF syndromes<sup>97</sup>.  
359 Because of the possible presence of different mtDNA in a single cell, disease symptoms  
360 associated with mtDNA mutation could be generated by quantitative changes in the  
361 proportion of mtDNA mutants<sup>98</sup>. Moreover, at the population level, the maternal transmission  
362 of mtDNA can prevent selection against mutations, which are deleterious only when  
363 expressed in males<sup>99</sup> and can lead to a decrease in population viability<sup>100</sup>.

364 **The necessity of a large space and time scales.** Genetic diversity can be sensible to many  
365 environmental parameters<sup>50</sup> and considering a global phylogeographic context could help to  
366 overcome this issue. Examining only CEZ and Slavutych tree frogs populations would have  
367 been insufficient to draw reliable conclusions about evolutionary processes. However, by  
368 putting local estimations of genetic diversity of tree frogs (i.e. in the Chernobyl region) in a  
369 global phylogeographic context for the species, we were able to get a more accurate picture of

370 the putative effects of radiocontamination on genetic variations and thus potential  
371 evolutionary processes of tree frogs populations in the CEZ. Our simulation data shows the  
372 need of a certain duration of exposure to radiation as well as the role of other factors like  
373 population size, generation time, and the mutation rate, to obtain a network pattern similar to  
374 that observed in the CEZ (Fig. 6d). It is possible that, depending on the life history of the  
375 organisms, genetic effects are different and/or not fully visible. Such difference might explain  
376 other recent findings showing an absence of visible radiation-induced mitochondrial  
377 microevolution<sup>101</sup>.

378 **Conclusions.** Our study on the genetics of the Eastern tree frog populations in the CEZ  
379 suggests the existence of a strong mutation process on mitochondrial DNA, resulting in an  
380 unexpected genetic structure of the CEZ populations comparing to other European  
381 populations. One challenge now is to understand the possible consequences of this genotypic  
382 effect on population status. Due to the crucial role of mitochondria<sup>102</sup> it seems unlikely these  
383 levels of mutation rate does not result in deleterious effects. The small population size  
384 predicted by our simulation may be a consequence of the elimination of non-viable  
385 individuals at birth, or due to other deleterious effects of ionizing radiation such as a reduction  
386 in breeding success (see e.g.<sup>103</sup>) or phenotypic disadvantage of mutations<sup>104,105</sup>. If the effects  
387 of these mutations do not fully compromise the maintenance of tree frog populations, it is not  
388 necessarily true for other organisms with different life history. With their large clutch sizes  
389 (up to 600 eggs per female per year<sup>106</sup>) tree frogs seem to be effective for supporting the  
390 deleterious effects of mutations, but it might not be the case for organisms with smaller litters  
391 for example. More detailed studies on species with different life history parameters are clearly  
392 needed to have a full picture of the eco-evolutionary effects of wildlife exposure to  
393 radioactive contamination.

394



## 395 **Materials and Methods**

### 396 **1 - Field work, capture and preparation of the samples**

397 In May and June 2016, 2017, and 2018 during the breeding season, we collected a total of 216  
398 *H. orientalis* individuals in 17 populations in wetlands located inside the CEZ and 2 outside  
399 the CEZ, i.e in the Slavutych region (Fig. 1b). For simplicity, we use here “population” in the  
400 meaning of “population sample”. These sites cover a gradient of ambient dose rates, that was  
401 measured using a hand-held radiometer (MKS-AT6130, ATOMTEX). The mean ( $\pm$ SD)  
402 ambient radiation dose rate varied from 0.044 to 32.4  $\mu$ Sv.h<sup>-1</sup>. After capture, individuals were  
403 kept in individual boxes with a perforated cover and 2 cm of water until the next morning  
404 when they were euthanized and dissected to sample tibia muscle. Collected tissue was quickly  
405 frozen at -196°C, transported to IRSN labs in Cadarache (France), and stored at -80 °C until  
406 DNA extraction. The geographic distances separating each pairwise combination of frog  
407 populations were estimated with ArcGIS and a UTM projection.

### 408 **2 – Population-averaged dose rate calculation**

409 The approach for population-averaged dose rate reconstruction was based on Giraudeau et al.,  
410 2018<sup>63</sup> (See Supplementary note 1 for details). The two main differences compared with the  
411 protocol carried out by Giraudeau et al.<sup>63</sup> are the radionuclides and the scenarios under  
412 consideration (Supplementary Fig. 3) because of the characteristics of the CEZ compared to  
413 the Fukushima situation. To summarize, soil activities (in Bq.kg<sup>-1</sup>) were extracted following  
414 Gashchak et al.<sup>107</sup> from a spatial database using a geometric mean over a 400m radius area  
415 centred on each population location and using a time correction, and water activities were  
416 calculated using soil activities and distribution coefficients estimated for the Glubokoye  
417 lake<sup>108</sup>. In addition, frog activities (in Bq.kg<sup>-1</sup>) were estimated for each individual in femur  
418 bones for <sup>90</sup>Sr, and in leg muscle for <sup>137</sup>Cs in the IRL-SSRI Laboratory (Slavutych, Ukraine),

419 and then reconstructed for the total frog knowing the total frog mass and the relative mass of  
420 bones (10%) and muscles (69%)<sup>109</sup>. A Canberra-Packard gamma-spectrometer with a high  
421 purity germanium (HPGe) detector (GC 3019) was used for measuring <sup>137</sup>Cs sample activity  
422 concentrations and a Beta-spectrometer EXPRESS-01 was used for measuring <sup>90</sup>Sr sample  
423 activity concentrations. For a more detailed description of measurement method of activity  
424 concentration see Beresford et al., 2020<sup>110</sup>. Then, dose coefficients (DCs) were calculated  
425 based on frog morphometry for internal exposure and four scenarios of external exposure  
426 using EDEN software<sup>111</sup>. DCs allow converting radionuclide activity (Bq.kg<sup>-1</sup>, Bq.L<sup>-1</sup>) into  
427 dose rate (μGy.h<sup>-1</sup>) and are specific for each radionuclide/scenario/organism combination. The  
428 total dose rate (in μGy.h<sup>-1</sup>) was calculated for each frog combining related dose coefficients  
429 and activities. Average total dose rates (ATDRs) were then obtained averaging for each  
430 population total dose rate of sampled individuals (Supplementary Fig. 4 and 5). Only the  
431 activity of <sup>90</sup>Sr and <sup>137</sup>Cs in frogs was measured, but the potential contribution of other less  
432 abundant radionuclides (<sup>241</sup>Am, <sup>238</sup>Pu, <sup>239</sup>Pu) to the total dose rate was estimated, leading to  
433 confirm their minor contribution to the total dose rate (on average less than a quarter of the  
434 total dose rate; see Supplementary Table 9, 10, 11 and Fig. 6). The total dose rate we assessed  
435 could potentially be slightly underestimated as other radionuclides than <sup>137</sup>Cs and <sup>90</sup>Sr were  
436 not included in the dose reconstruction. Nevertheless, in the CEZ the soil activity of <sup>90</sup>Sr and  
437 <sup>137</sup>Cs is correlated to the activity of other less abundant radionuclides<sup>68</sup> as for the body  
438 activity of organisms such as small mammals<sup>112</sup>, thus our ATDR descriptor based on <sup>90</sup>Sr and  
439 <sup>137</sup>Cs is reliable for statistical tests.

### 440 **3 - DNA extraction, sequencing and genotyping**

441 DNA was extracted from tibia muscle using DNeasy Blood and Tissue Kit (Qiagen, Valencia,  
442 CA) following the manufacturer's protocol. After the estimation of nucleotide concentration  
443 with a spectrophotometric measurement and an electrophoresis quality check, a 957 bp

444 fragment of mitochondrial DNA, cytochrome b, and 21 nuclear microsatellites were studied  
445 (Supplementary Table 8). Mitochondrial and nuclear markers were used simultaneously in  
446 order to compare their different properties. To sequence the cytochrome b, a PCR  
447 amplification was performed using Hyla-L0 and Hyla-H1046 primers<sup>62,113</sup>. For each  
448 amplification session, a negative control was made using 3 $\mu$ L of water instead of extracted  
449 DNA, and an electrophoresis was done to control the proper functioning of the amplification.  
450 PCR-products were sequenced in both directions using Sanger sequencing (Eurofins,  
451 sequencing platform Cochin, France). The quality was checked using ab1 files. Sequences  
452 were aligned with MUSCLE program and corrected with MEGA<sup>114</sup>. In some cases, for the  
453 same position, an individual showed two different nucleotides. The mtDNA being haploid, it  
454 can be interpreted as an heteroplasmy<sup>115</sup>(i.e. the presence of multiple mtDNA haplotypes in  
455 an individual). For each of these individuals, the two haplotypes were considered. Four  
456 multiplex amplifications were then performed for the 21 microsatellite markers  
457 (Supplementary Table 8). Formamide and a Size Standard were added to the PCR-products  
458 and the whole was then genotyped with ABI-3100 Genetic Analyser (ThermoFisher  
459 Scientific). A second amplification and genotyping was carried out on 4 individuals in order  
460 to check the replicability of the method.

#### 461 **4 – Genetic analyses, mtDNA and nDNA**

462 First of all, a quantitative analysis of population genetics was performed for the two types of  
463 markers. In order to avoid sample size artefacts, only populations with sample size higher or  
464 equal than 7 individuals were used to describe the genetic diversity. Because sample sizes  
465 were still non-homogeneous between populations, rarefaction technique was performed for  
466 cytochrome b to calculate haplotypic richness (nrH) and private estimated haplotype number  
467 (npH) using hp-rare<sup>116</sup>. The haplotype diversity (h)<sup>117</sup>, nucleotide diversity ( $\pi$ )<sup>118</sup> and three  
468 estimators of  $\theta$  index ( $\theta_s$ ,  $\theta_k$ ,  $\theta\pi$ )<sup>118-120</sup> were calculated for the cytochrome b using

469 ARLEQUIN<sup>121</sup>. To describe how the mitochondrial genetic variation is structured temporally  
470 and geographically, the Analysis of Molecular Variance (AMOVA)<sup>69</sup> and the calculation of a  
471 differentiation index – pairwise  $F_{st}$  - were performed using ARLEQUIN. For microsatellites  
472 markers, we estimated the observed heterozygosity ( $H_o$ ), the estimated heterozygosity under  
473 Hardy-Weinberg assumptions ( $H_e$ ), the genetic diversity ( $H_s$ ), the allelic richness (AR) and  
474 the private allelic richness (PA) using GENETIX<sup>122</sup>, ADZE<sup>123</sup>, and Fstat<sup>124</sup>. Pairwise  $F_{st}$  for  
475 microsatellites were calculated using Fstat. The absolute value of the lowest  $F_{st}$  for the  
476 mitochondrial and nuclear markers was added to every pairwise  $F_{st}$  in order to get only  
477 positive pairwise  $F_{st}$ . We calculated the ratio  $F_{st}/(1-F_{st})$  in order to estimate genetic distance  
478 between populations, and represented these distances using Neighbour-Joining trees with  
479 genetic distances estimated with MEGA<sup>114</sup>.

480 A qualitative analysis of sequences was carried out for cytochrome b. The haplotypes were  
481 determined using DNAsp<sup>125</sup>, the haplotype network was calculated with the Median-Joining  
482 method<sup>126</sup> and drawn using POPART<sup>127</sup>.

### 483 **5 – Simulation of haplotype networks**

484 Simulations of mitochondrial haplotype networks were conducted with a method close to the  
485 Approximate Bayesian Computation<sup>128</sup> (for details on protocol see Supplementary note 2).

486 Simulations of the haplotype evolution during 10 and 15 generations (assuming one  
487 generation respectively every two or three years<sup>85,86</sup>) in a unique population were conducted  
488 in R and Pegas library<sup>129</sup> using different parameters: (i) the founder population size ( $N_0$ )  
489 corresponding to specimens able to reproduce after the accident, (ii) the frequencies of  
490 haplotypes in the founder population based on the current diversity observed for the  
491 Slavutych populations, (iii) the population size for each year during the 10 or 15 generations  
492 ( $N_{1-n}$ ), (iv) the nucleotide substitution rate ( $\mu$ ) and (v) the number of generations. A haplotype

493 network was generated for the last generation for each data set obtained with a set of value for  
494 prior parameters. After a first simulation running with classical wild frog population prior  
495 parameters<sup>72</sup> (1000 simulations for each modality combination, a total of 6000 simulations), a  
496 second simulation was performed with different prior parameters calibrated from the first  
497 simulation results (100 simulations for each modality combination, a total of 21600  
498 simulations) (see Supplementary Table 12 and 13 for prior parameters details). Each  
499 haplotype network was described by five statistics: the nucleotide diversity ( $\pi$ ), the D Tajima,  
500 the haplotype richness (nrH), the haplotype diversity (h), and the number of steps separating  
501 the ancestral haplotype to the most distant haplotype plus one. A Principal Component  
502 Analysis (PCA) was performed to compare simulated and observed descriptive statistics. The  
503 two first principal component axes were used to visualise both sets of descriptive statistics. A  
504 Ward hierarchical cluster analysis on Euclidean distance was used to select the 5<sup>th</sup> percentile  
505 of the simulated descriptive statistics closest to the observed descriptive statistics. The mean  
506 and median of the 5<sup>th</sup> percentile simulated descriptive statistics were calculated to estimate the  
507 posterior parameters  $N_0$ , the appropriate haplotype frequencies for the founder population,  $N_{1-}$   
508  $n$  and  $\mu$ . Visualisation of the haplotype network for prior, 10<sup>th</sup> and 15<sup>th</sup> generation was done  
509 using TempNet<sup>130</sup>.

## 510 **6 - Statistical analysis**

511 Non-parametric Wilcoxon signed rank tests were performed to compare genetic diversity  
512 indices, between CEZ populations and outside CEZ populations, because of their non-normal  
513 distribution tested using Shapiro-Wilk test. Non-parametric Spearman rank test were used to  
514 test the correlation between genetic diversity indices and the population-averaged dose rate  
515 (ATDR). The correlation between two matrices, the genetic distance matrix obtained with the  
516 Fst linearization and the matrix of logarithm of geographical distance (in m), was performed  
517 using a Mantel test<sup>70</sup> with the vegan package<sup>131</sup>. The part of pairwise population-averaged

518 dose-rate differences between populations on the distances correlation was tested using a  
519 partial Mantel test. The significance of Mantel tests was estimated with 9999 permutations.  
520 All these tests were carried out on R version 3.6.1.<sup>132</sup>

521 To test the demographical expansion hypothesis with haplotype networks, three statistical  
522 tests were performed on DNAsp. The neutral assumption of the absence of deviation from the  
523 mutation-drift equilibrium was tested using the Tajima's  $D$ <sup>133</sup> and Fu's  $D^*$ <sup>134</sup>. The distribution  
524 of pairwise differences between sequences was studied too, using the  $R2$  statistic<sup>135</sup>.

525 **References**

- 526 1. Brondizio, E. S., Settele, J., Díaz, S. & Ngo, H. T. *Global assessment report on*  
527 *biodiversity and ecosystem services of the Intergovernmental Science-Policy Platform on*  
528 *Biodiversity and Ecosystem Services*. (2019).
- 529 2. Beresford, N. A. & Coplestone, D. Effects of ionizing radiation on wildlife: What  
530 knowledge have we gained between the Chernobyl and Fukushima accidents? *Integrated*  
531 *Environ. Assess. Manag.* **7**, 371–373 (2011).
- 532 3. Steinhauser, G., Brandl, A. & Johnson, T. E. Comparison of the Chernobyl and  
533 Fukushima nuclear accidents: A review of the environmental impacts. *Sci. Total Environ.*  
534 **470–471**, 800–817 (2014).
- 535 4. Imanaka, T., Hayashi, G. & Endo, S. Comparison of the accident process, radioactivity  
536 release and ground contamination between Chernobyl and Fukushima-1. *J. Radiat. Res.*  
537 **56**, 56–61 (2015).
- 538 5. Geras'kin, S. A., Fesenko, S. V. & Alexakhin, R. M. Effects of non-human species  
539 irradiation after the Chernobyl NPP accident. *Environ. Int.* **34**, 880–897 (2008).
- 540 6. Møller, A. P. & Mousseau, T. A. Biological consequences of Chernobyl: 20 years on.  
541 *Trends Ecol. Evol.* **21**, 200–207 (2006).
- 542 7. Alexakhin, R. *et al.* *Environmental consequences of the Chernobyl accident and their*  
543 *remediation: Twenty years of experience. Report of the Chernobyl Forum Expert group*  
544 *“Environment”*. (International Atomic Energy Agency, 2006).
- 545 8. Beresford, N. A. *et al.* Towards solving a scientific controversy - The effects of ionising  
546 radiation on the environment. *J. Environ. Radioact.* **211**, 106033 (2020).
- 547 9. Bréchnignac, F. & Paquet, F. Radiation-induced risks at low dose: moving beyond  
548 controversy towards a new vision. *Radiat. Environ. Bioph.* **52**, 299–301 (2013).

- 549 10. Mothersill, C. & Seymour, C. Uncomfortable issues in radiation protection posed by low-  
550 dose radiobiology. *Radiat. Environ. Bioph.* **52**, 293–298 (2013).
- 551 11. Morgan, W. F. & Bair, W. J. Issues in low dose radiation biology: the controversy  
552 continues. A perspective. *Radiat. Res.* **179**, 501–510 (2013).
- 553 12. Bickham, J. W. The four cornerstones of Evolutionary Toxicology. *Ecotoxicology* **20**,  
554 497–502 (2011).
- 555 13. Medina, M. H., Correa, J. A. & Barata, C. Micro-evolution due to pollution: Possible  
556 consequences for ecosystem responses to toxic stress. *Chemosphere* **67**, 2105–2114  
557 (2007).
- 558 14. Theodorakis, C. W. Integration of genotoxic and population genetic endpoints in  
559 biomonitoring and risk assessment. *Ecotoxicology* **10**, 245–256 (2001).
- 560 15. Bezrukov, V. *et al.* Heterogeneous relationships between abundance of soil surface  
561 invertebrates and radiation from Chernobyl. *Ecol. Indic.* **52**, 128–133 (2015).
- 562 16. Chapon, V. *et al.* Microbial diversity in contaminated soils along the T22 trench of the  
563 Chernobyl experimental platform. *J. App. Geochem.* **27**, 1375–1383 (2012).
- 564 17. Deryabina, T. G. *et al.* Long-term census data reveal abundant wildlife populations at  
565 Chernobyl. *Curr. Biol.* **25**, R824–R826 (2015).
- 566 18. Lecomte-Pradines, C. *et al.* Soil nematode assemblages as bioindicators of radiation  
567 impact in the Chernobyl Exclusion Zone. *Sci. Total Environ.* **490**, 161–170 (2014).
- 568 19. Gashchak, S., Gulyaichenko, Y., Beresford, N. A. & Wood, M. D. European bison (*Bison*  
569 *bonasus*) in the Chornobyl Exclusion Zone (Ukraine) and prospects for its revival.  
570 *Proceedings of the Theriological School* **15**, 58–66 (2017).
- 571 20. Gashchak, S., Gulyaichenko, Y., Beresford, N. A. & Wood, M. D. Brown bear (*Ursus*  
572 *arctos* L.) in the Chornobyl exclusion zone. *Proceedings of the Theriological School* **14**,  
573 71–84 (2016).



- 574 21. Møller, A. P. & Mousseau, T. A. Reduced abundance of insects and spiders linked to  
575 radiation at Chernobyl 20 years after the accident. *Biol. Lett.* **5**, 356–359 (2009).
- 576 22. Møller, A. P., Nishiumi, I., Suzuki, H., Ueda, K. & Mousseau, T. A. Differences in effects  
577 of radiation on abundance of animals in Fukushima and Chernobyl. *Ecol. Indic.* **24**, 75–81  
578 (2013).
- 579 23. Møller, A. P. & Mousseau, T. A. Assessing effects of radiation on abundance of  
580 mammals and predator–prey interactions in Chernobyl using tracks in the snow. *Ecol.*  
581 *Indic.* **26**, 112–116 (2013).
- 582 24. Møller, A. P. & Mousseau, T. A. Reduced colonization by soil invertebrates to irradiated  
583 decomposing wood in Chernobyl. *Sci. Total Environ.* **645**, 773–779 (2018).
- 584 25. Morelli, F., Benedetti, Y., Mousseau, T. A. & Møller, A. P. Ionizing radiation and  
585 taxonomic, functional and evolutionary diversity of bird communities. *J. Environ.*  
586 *Manage.* **220**, 183–190 (2018).
- 587 26. Murphy, J. F., Nagorskaya, L. L. & Smith, J. T. Abundance and diversity of aquatic  
588 macroinvertebrate communities in lakes exposed to Chernobyl-derived ionising radiation.  
589 *J. Environ. Radioact.* **102**, 688–694 (2011).
- 590 27. Schlichting, P. E., Love, C. N., Webster, S. C. & Beasley, J. C. Efficiency and  
591 composition of vertebrate scavengers at the land-water interface in the Chernobyl  
592 Exclusion Zone. *Food Webs* **18**, e00107 (2019).
- 593 28. Shkvyria, M. & Vishnevskiy, D. Large carnivores of the Chernobyl Nuclear Power Plant  
594 Exclusion Zone. *Vestnik zoologii* **46**, 21–28 (2012).
- 595 29. Zaitsev, A. S., Gongalsky, K. B., Nakamori, T. & Kaneko, N. Ionizing radiation effects  
596 on soil biota: Application of lessons learned from Chernobyl accident for radioecological  
597 monitoring. *Pedobiologia* **57**, 5–14 (2014).

- 598 30. Webster, S. C. *et al.* Where the wild things are: influence of radiation on the distribution  
599 of four mammalian species within the Chernobyl Exclusion Zone. *Front. Ecol. Environ.*  
600 **14**, 185–190 (2016).
- 601 31. Arnaise, S., Shykoff, J. A., Møller, A. P., Mousseau, T. A. & Giraud, T. Anther-smut  
602 fungi from more contaminated sites in Chernobyl show lower infection ability and lower  
603 viability following experimental irradiation. *Ecol. Evol.* doi:10.1002/ece3.6376.
- 604 32. Møller, A. P. & Mousseau, T. A. Are organisms adapting to ionizing radiation at  
605 Chernobyl? *Trends Ecol. Evol.* **31**, 281–289 (2016).
- 606 33. Bickham, J. W., Sandhu, S., Hebert, P. D. N., Chikhi, L. & Athwal, R. Effects of  
607 chemical contaminants on genetic diversity in natural populations: implications for  
608 biomonitoring and ecotoxicology. *Mutat. Res. Rev. Mutat. Res.* **463**, 33–51 (2000).
- 609 34. Giska, I., Babik, W., van Gestel, C. A. M., van Straalen, N. M. & Laskowski, R. Genome-  
610 wide genetic diversity of rove beetle populations along a metal pollution gradient.  
611 *Ecotoxicol. Environ. Saf.* **119**, 98–105 (2015).
- 612 35. Straalen, N. M. van & Timmermans, M. J. T. N. Genetic variation in toxicant-stressed  
613 populations: An evaluation of the “genetic erosion” hypothesis. *Hum. Ecol. Risk Assess.*  
614 **8**, 983–1002 (2002).
- 615 36. Ungherese, G. *et al.* Relationship between heavy metals pollution and genetic diversity in  
616 Mediterranean populations of the sandhopper *Talitrus saltator* (Montagu) (Crustacea,  
617 Amphipoda). *Environ. Pollut.* **158**, 1638–1643 (2010).
- 618 37. Fasola, E., Ribeiro, R. & Lopes, I. Microevolution due to pollution in amphibians: A  
619 review on the genetic erosion hypothesis. *Environ. Pollut.* **204**, 181–190 (2015).
- 620 38. Hughes, A. R., Inouye, B. D., Johnson, M. T. J., Underwood, N. & Vellend, M.  
621 Ecological consequences of genetic diversity. *Ecol. Lett.* **11**, 609–623 (2008).

- 622 39. Luquet, E. *et al.* Consequences of genetic erosion on fitness and phenotypic plasticity in  
623 European tree frog populations (*Hyla arborea*). *J. Evol. Biol.* **24**, 99–110 (2011).
- 624 40. Millette, K. L. *et al.* No consistent effects of humans on animal genetic diversity  
625 worldwide. *Ecol. Lett.* **23**, 55–67 (2019).
- 626 41. Ribeiro, R. & Lopes, I. Contaminant driven genetic erosion and associated hypotheses on  
627 alleles loss, reduced population growth rate and increased susceptibility to future  
628 stressors: an essay. *Ecotoxicology* **22**, 889–899 (2013).
- 629 42. De Wolf, H., Blust, R. & Backeljau, T. The population genetic structure of *Littorina*  
630 *littorea* (Mollusca: Gastropoda) along a pollution gradient in the Scheldt estuary (The  
631 Netherlands) using RAPD analysis. *Sci. Total Environ.* **325**, 59–69 (2004).
- 632 43. Murdoch, M. H. & Hebert, P. D. N. Mitochondrial dna diversity of brown bullhead from  
633 contaminated and relatively pristine sites in the great lakes. *Environ. Toxicol. Chem.* **13**,  
634 1281–1289 (1994).
- 635 44. Ribeiro, R., Baird, D. J., Soares, A. M. V. M. & Lopes, I. Contaminant driven genetic  
636 erosion: A case study with *Daphnia longispina*. *Environ. Toxicol. Chem.* **31**, 977–982  
637 (2012).
- 638 45. Wang, W., Zheng, Y., Zhao, J. & Yao, M. Low genetic diversity in a critically  
639 endangered primate: shallow evolutionary history or recent population bottleneck? *BMC*  
640 *Evol. Biol.* **19**, 134 (2019).
- 641 46. Baker, R. J. *et al.* Consequences of polluted environments on population structure: The  
642 bank vole (*Clethrionomys glareolus*) at Chernobyl. *Ecotoxicology* **10**, 211–216 (2001).
- 643 47. Baker, R. J. *et al.* Elevated mitochondrial genome variation after 50 generations of  
644 radiation exposure in a wild rodent. *Evol. Appl.* **10**, 784–791 (2017).

- 645 48. Matson, C. W., Rodgers, B. E., Chesser, R. K. & Baker, R. J. Genetic diversity of  
646 *Clethrionomys glareolus* populations from highly contaminated sites in the Chernobyl  
647 region, Ukraine. *Environ. Toxicol. Chem.* **19**, 2130–2135 (2000).
- 648 49. Meeks, H. N. *et al.* Mitochondrial control region variation in bank voles (*Clethrionomys*  
649 *glareolus*) is not related to Chernobyl radiation exposure. *Environ. Toxicol. Chem.* **26**,  
650 361–369 (2007).
- 651 50. Meeks, H. N., Chesser, R. K., Rodgers, B. E., Gaschak, S. & Baker, R. J. Understanding  
652 the genetic consequences of environmental toxicant exposure: Chernobyl as a model  
653 system. *Environ. Toxicol. Chem.* **28**, 1982–1994 (2009).
- 654 51. Wickliffe, J. K. *et al.* Variation in mitochondrial DNA control region haplotypes in  
655 populations of the bank vole, *Clethrionomys glareolus*, living in the Chernobyl  
656 environment, Ukraine. *Environ. Toxicol. Chem.* **25**, 503–508 (2006).
- 657 52. Dubrova, Y. E. Long-term genetic effects of radiation exposure. *Mutat. Res. Rev. Mutat.*  
658 *Res.* **544**, 433–439 (2003).
- 659 53. Ellegren, H., Lindgren, G., Primmer, C. R. & Møller, A. P. Fitness loss and germline  
660 mutations in barn swallows breeding in Chernobyl. *Nature* **389**, 593–596 (1997).
- 661 54. Bondarkov, M. D. *et al.* Environmental radiation monitoring in the Chernobyl exclusion  
662 zone - history and results 25 years after. *Health Phys.* **101**, 442–485 (2011).
- 663 55. Dias, P. C. Sources and sinks in population biology. *Trends Ecol. Evol.* **11**, 326–330  
664 (1996).
- 665 56. Matson, C. W. *et al.* Evolutionary Toxicology: Population-level effects of chronic  
666 contaminant exposure on the marsh frogs (*Rana ridibunda*) of Azerbaijan. *Environ.*  
667 *Health Perspect.* **114**, 547–552 (2006).
- 668 57. Pulliam, H. R. Sources, sinks, and population regulation. *Am. Nat.* **132**, 652–661 (1988).

- 669 58. Theodorakis, C. W., Bickham, J. W., Lamb, T., Medica, P. A. & Lyne, T. B. Integration  
670 of genotoxicity and population genetic analyses in kangaroo rats (*Dipodomys merriami*)  
671 exposed to radionuclide contamination at the Nevada Test Site, USA. *Environ. Toxicol.*  
672 *Chem.* **20**, 10 (2001).
- 673 59. Kesäniemi, J. *et al.* Analysis of heteroplasmy in bank voles inhabiting the Chernobyl  
674 exclusion zone: A commentary on Baker *et al.* (2017) “Elevated mitochondrial genome  
675 variation after 50 generations of radiation exposure in a wild rodent.” *Evol. Appl.* **11**,  
676 820–826 (2018).
- 677 60. Møller, A. P., Hobson, K. A., Mousseau, T. A. & Peklo, A. M. Chernobyl as a population  
678 sink for barn swallows: tracking dispersal using stable-isotope profiles. *Ecol. Appl.* **16**,  
679 1696–1705 (2006).
- 680 61. Stöck, M. *et al.* Cryptic diversity among Western Palearctic tree frogs: Postglacial range  
681 expansion, range limits, and secondary contacts of three European tree frog lineages  
682 (*Hyla arborea* group). *Mol. Phylogenet. Evol.* **65**, 1–9 (2012).
- 683 62. Dufresnes, C. *et al.* Evolutionary melting pots: a biodiversity hotspot shaped by ring  
684 diversifications around the Black Sea in the Eastern tree frog (*Hyla orientalis*). *Mol. Ecol.*  
685 **25**, 4285–4300 (2016).
- 686 63. Giraudeau, M. *et al.* Carotenoid distribution in wild Japanese tree frogs (*Hyla japonica*)  
687 exposed to ionizing radiation in Fukushima. *Sci. Rep.* **8**, 7438 (2018).
- 688 64. Stark, K., Scott, D. E., Tsyusko, O., Coughlin, D. P. & Hinton, T. G. Multi-level effects  
689 of low dose rate ionizing radiation on southern toad, *Anaxyrus [Bufo] terrestris*. *PLoS*  
690 *One* **10**, e0125327 (2015).
- 691 65. Brown, W. M., George, M. & Wilson, A. C. Rapid evolution of animal mitochondrial  
692 DNA. *PNAS* **76**, 1967–1971 (1979).

- 693 66. Harrison, R. G. Animal mitochondrial DNA as a genetic marker in population and  
694 evolutionary biology. *Trends Ecol. Evol.* **4**, 6–11 (1989).
- 695 67. Selkoe, K. & Toonen, R. Microsatellites for ecologists: A practical guide to using and  
696 evaluating microsatellite markers. *Ecol. Lett.* **9**, 615–29 (2006).
- 697 68. Bonzom, J.-M. *et al.* Effects of radionuclide contamination on leaf litter decomposition in  
698 the Chernobyl exclusion zone. *Sci. Total Environ.* **562**, 596–603 (2016).
- 699 69. Excoffier, L. Analysis of Population Subdivision. in *Handbook of Statistical Genetics*  
700 (American Cancer Society, 2004).
- 701 70. Mantel, N. The detection of disease clustering and a generalized regression approach.  
702 *Cancer Res.* **27**, 209–220 (1967).
- 703 71. Kashparov, V. *et al.* Spatial datasets of radionuclide contamination in the Ukrainian  
704 Chernobyl Exclusion Zone. *Earth Syst. Sci. Data* **10**, 339–353 (2018).
- 705 72. Lynch, M. & Walsh, B. *The origins of genome architecture*. (Sinauer Associates, 2007).
- 706 73. Møller, A. P. & Mousseau, T. A. Species richness and abundance of forest birds in  
707 relation to radiation at Chernobyl. *Biol. Lett.* **3**, 483–486 (2007).
- 708 74. Canestrelli, D., Verardi, A. & Nascetti, G. Genetic differentiation and history of  
709 populations of the Italian treefrog *Hyla intermedia*: lack of concordance between  
710 mitochondrial and nuclear markers. *Genetica* **130**, 241 (2006).
- 711 75. Toews, D. & Brelsford, A. The biogeography of mitochondrial and nuclear discordance in  
712 animals. *Mol. Ecol.* **21**, 3907–3930 (2012).
- 713 76. Kazak, L., Reyes, A. & Holt, I. J. Minimizing the damage: repair pathways keep  
714 mitochondrial DNA intact. *Nat. Rev. Mol. Cell Biol.* **13**, 659–671 (2012).
- 715 77. Larsen, N. B., Rasmussen, M. & Rasmussen, L. J. Nuclear and mitochondrial DNA  
716 repair: similar pathways? *Mitochondrion* **5**, 89–108 (2005).

- 717 78. Allio, R., Donega, S., Galtier, N. & Nabholz, B. Large variation in the ratio of  
718 mitochondrial to nuclear mutation rate across animals: Implications for genetic diversity  
719 and the use of mitochondrial DNA as a molecular marker. *Mol. Biol. Evol.* **34**, 2762–2772  
720 (2017).
- 721 79. Helfer, V., Broquet, T. & Fumagalli, L. Sex-specific estimates of dispersal show female  
722 philopatry and male dispersal in a promiscuous amphibian, the alpine salamander  
723 (*Salamandra atra*). *Mol. Ecol.* **21**, 4706–4720 (2012).
- 724 80. Honeycutt, R. K., Garwood, J. M., Lowe, W. H. & Hossack, B. R. Spatial capture–  
725 recapture reveals age- and sex-specific survival and movement in stream amphibians.  
726 *Oecologia* **190**, 821–833 (2019).
- 727 81. Wickliffe, J. K., Chesser, R. K., Rodgers, B. E. & Baker, R. J. Assessing the genotoxicity  
728 of chronic environmental irradiation by using mitochondrial dna heteroplasmy in the bank  
729 vole (*Clethrionomys glareolus*) at Chernobyl, Ukraine. *Environ. Toxicol. Chem.* **21**,  
730 1249–1254 (2002).
- 731 82. Batalha-Filho, H., Cabanne, G. S. & Miyaki, C. Y. Phylogeography of an Atlantic forest  
732 passerine reveals demographic stability through the last glacial maximum. *Mol.*  
733 *Phylogenet. Evol.* **65**, 892–902 (2012).
- 734 83. Pulido-Santacruz, P., Bornschein, M. R., Belmonte-Lopes, R. & Bonatto, S. L. Multiple  
735 evolutionary units and demographic stability during the last glacial maximum in the  
736 *Scytalopus speluncae* complex (Aves: Rhinocryptidae). *Mol. Phylogenet. Evol.* **102**, 86–  
737 96 (2016).
- 738 84. Vojtovich, M. A. Bones tumours of *Rana temporaria* L. in conditions of radionuclide  
739 contamination of biotope. *Doklady Natsional'noj Akademii Nauk Belarusi* **45**, 91–94  
740 (2001).

- 741 85. Altunisik, A. & Özdemir, N. Body size and age structure of a highland population of *Hyla*  
742 *orientalis* BEDRIAGA, 1890, in northern Turkey. *Herpetozoa* **26**, 49–55 (2013).
- 743 86. Özdemir, N. *et al.* Variation in body size and age structure among three Turkish  
744 populations of the treefrog *Hyla arborea*. *Amphibia-Reptilia* **33**, 25–35 (2012).
- 745 87. Dutilleul, M. *et al.* Adaptation costs to constant and alternating polluted environments.  
746 *Evol. Appl.* **10**, 839–851 (2017).
- 747 88. Brans, K. I. & Meester, L. D. City life on fast lanes: Urbanization induces an evolutionary  
748 shift towards a faster lifestyle in the water flea *Daphnia*. *Funct. Ecol.* **32**, 2225–2240  
749 (2018).
- 750 89. Breimer, L. H. Ionizing radiation-induced mutagenesis. *Br. J. Cancer* **57**, 6–18 (1988).
- 751 90. Hancock, S. *et al.* Effects of historic radiation dose on the frequency of sex-linked  
752 recessive lethals in *Drosophila* populations following the Chernobyl nuclear accident.  
753 *Environ. Res.* **172**, 333–337 (2019).
- 754 91. Hancock, S. *et al.* Transgenerational effects of historic radiation dose in pale grass blue  
755 butterflies around Fukushima following the Fukushima Dai-ichi Nuclear Power Plant  
756 meltdown accident. *Environ. Res.* **168**, 230–240 (2019).
- 757 92. Sakauchi, K., Taira, W., Hiyama, A., Imanaka, T. & Otaki, J. M. The pale grass blue  
758 butterfly in ex-evacuation zones 5.5 years after the Fukushima nuclear accident:  
759 Contributions of initial high-dose exposure to transgenerational effects. *J. Asia Pac.*  
760 *Entomol.* **23**, 242–252 (2020).
- 761 93. Kam, W. W.-Y. & Banati, R. B. Effects of ionizing radiation on mitochondria. *Free*  
762 *Radical Bio. Med.* **65**, 607–619 (2013).
- 763 94. Fuller, N. *et al.* Chronic radiation exposure at Chernobyl shows no effect on genetic  
764 diversity in the freshwater crustacean, *Asellus aquaticus* thirty years on. *Ecol. Evol.* **9**,  
765 10135–10144 (2019).



- 766 95. Johns, D. R. & Neufeld, M. J. Cytochrome b mutations in Leber hereditary optic  
767 neuropathy. *Biochem. Biophys. Res. Commun.* **181**, 1358–1364 (1991).
- 768 96. Hirano, M. & Pavlakis, S. G. Topical Review: Mitochondrial Myopathy, Encephalopathy,  
769 Lactic Acidosis, and Strokelike Episodes (MELAS): Current Concepts: *J. Child Neurol.*  
770 **9**, (1994).
- 771 97. Shoffner, J. M. *et al.* Myoclonic epilepsy and ragged-red fiber disease (MERRF) is  
772 associated with a mitochondrial DNA tRNA<sup>Lys</sup> mutation. *Cell* **61**, 931–937 (1990).
- 773 98. Picard, M. *et al.* Progressive increase in mtDNA 3243A>G heteroplasmy causes abrupt  
774 transcriptional reprogramming. *PNAS* **111**, E4033–E4042 (2014).
- 775 99. Innocenti, P., Morrow, E. H. & Dowling, D. K. Experimental Evidence Supports a Sex-  
776 Specific Selective Sieve in Mitochondrial Genome Evolution. *Science* **332**, 845–848  
777 (2011).
- 778 100. Gemmell, N. J. & Allendorf, F. W. Mitochondrial mutations may decrease population  
779 viability. *Trends Ecol. Evol.* **16**, 115–117 (2001).
- 780 101. Newbold, L. K. *et al.* Genetic, epigenetic and microbiome characterisation of an  
781 earthworm species (*Octolasion lacteum*) along a radiation exposure gradient at  
782 Chernobyl. *Environ. Pollut.* **255**, 113238 (2019).
- 783 102. Roubicek, D. A. & Souza-Pinto, N. C. de. Mitochondria and mitochondrial DNA as  
784 relevant targets for environmental contaminants. *Toxicology* **391**, 100–108 (2017).
- 785 103. Mappes, T. *et al.* Ecological mechanisms can modify radiation effects in a key forest  
786 mammal of Chernobyl. *Ecosphere* **10**, e02667 (2019).
- 787 104. Dowling, D. K. Evolutionary perspectives on the links between mitochondrial  
788 genotype and disease phenotype. *Biochim. Biophys. Acta* **1840**, 1393–1403 (2014).
- 789 105. Ballard, J. W. O. & Pichaud, N. Mitochondrial DNA: more than an evolutionary  
790 bystander. *Funct. Ecol.* **28**, 218–231 (2014).

- 791 106. Broquet, T., Jaquiéry, J. & Perrin, N. Opportunity for Sexual Selection and Effective  
792 Population Size in the Lek-Breeding European Treefrog (*Hyla arborea*). *Evolution* **63**,  
793 674–683 (2009).
- 794 107. Gashchak, S., Beresford, N. A., Maksimenko, A. & Vlaschenko, A. S. Strontium-90  
795 and caesium-137 activity concentrations in bats in the Chernobyl exclusion zone. *Radiat.*  
796 *Environ. Bioph.* **49**, 635–644 (2010).
- 797 108. Matsunaga, T. *et al.* Characteristics of Chernobyl-derived radionuclides in particulate  
798 form in surface waters in the exclusion zone around the Chernobyl Nuclear Power Plant.  
799 *J. Contam.Hydrol.* **35**, 101–113 (1998).
- 800 109. Barnett, C. L. *et al.* *Quantification of Radionuclide Transfer in Terrestrial and*  
801 *Freshwater Environments for Radiological Assessments. IAEA-TECDOC-1616.* vol.  
802 No.1616 (IAEA, 2009).
- 803 110. Beresford, N. A. *et al.* Radionuclide transfer to wildlife at a ‘Reference Site’ in the  
804 Chernobyl Exclusion Zone and resultant radiation exposures. *J. Environ. Radioact.* **211**,  
805 105661 (2020).
- 806 111. Beaugelin-Seiller, K., Jasserand, F., Garnier-Laplace, J. & Gariel, J. C. Modeling  
807 radiological dose in non-human species: principles, computerization, and application.  
808 *Health Phys.* **90**, 485–493 (2006).
- 809 112. Beresford, N. A. *et al.* Estimating the exposure of small mammals at three sites within  
810 the Chernobyl exclusion zone – a test application of the ERICA Tool. *J. Environ.*  
811 *Radioact.* **99**, 1496–1502 (2008).
- 812 113. Stöck, M. *et al.* Mitochondrial and nuclear phylogeny of circum-Mediterranean tree  
813 frogs from the *Hyla arborea* group. *Mol. Phylogenet. Evol.* **49**, 1019–1024 (2008).
- 814 114. Kumar, S., Stecher, G. & Tamura, K. MEGA7: Molecular Evolutionary Genetics  
815 Analysis version 7.0 for bigger datasets. *Mol. Biol. Evol.* **33**, 1870–1874 (2016).

- 816 115. Hauswirth, W. W. & Laipis, P. J. Mitochondrial DNA polymorphism in a maternal  
817 lineage of Holstein cows. *PNAS* **79**, 4686–4690 (1982).
- 818 116. Kalinowski, S. T. hp-rare 1.0: a computer program for performing rarefaction on  
819 measures of allelic richness. *Mol. Ecol. Notes* **5**, 187–189 (2005).
- 820 117. Nei, M. *Molecular Evolutionary Genetics*. (Columbia University Press, 1987).
- 821 118. Tajima, F. Evolutionary relationship of dna sequences in finite populations. *Genetics*  
822 **105**, 437–460 (1983).
- 823 119. Ewens, W. J. The sampling theory of selectively neutral alleles. *Theor. Popul. Biol.* **3**,  
824 87–112 (1972).
- 825 120. Watterson, G. A. On the number of segregating sites in genetical models without  
826 recombination. *Theor. Popul. Biol.* **7**, 256–276 (1975).
- 827 121. Excoffier, L., Laval, G. & Schneider, S. Arlequin (version 3.0): An integrated software  
828 package for population genetics data analysis. *Evol. Bioinform. Online* **1**, 47–50 (2005).
- 829 122. Belkhir, K., Borsa, P., Chikhi, L., Raufaste, N. & Bonhomme, F. *GENETIX 4.05*,  
830 *logiciel sous Windows TM pour la genetique des populations*. (2004).
- 831 123. Szpiech, Z. A., Jakobsson, M. & Rosenberg, N. A. ADZE: A rarefaction approach for  
832 counting alleles private to combinations of populations. *Bioinformatics* **24**, 2498–2504  
833 (2008).
- 834 124. Goudet, J. FSTAT (Version 1.2): A computer program to calculate F-statistics. *J.*  
835 *Hered.* **86**, 485–486 (1995).
- 836 125. Rozas, J. *et al.* DnaSP 6: DNA sequence polymorphism analysis of large data sets.  
837 *Mol. Biol. Evol.* **34**, 3299–3302 (2017).
- 838 126. Bandelt, H. J., Forster, P. & Röhl, A. Median-joining networks for inferring  
839 intraspecific phylogenies. *Mol. Biol. Evol.* **16**, 37–48 (1999).

- 840 127. Leigh, J. W. & Bryant, D. Popart: full-feature software for haplotype network  
841 construction. *Methods Ecol. Evol.* **6**, 1110–1116 (2015).
- 842 128. Beaumont, M. A., Zhang, W. & Balding, D. J. Approximate Bayesian computation in  
843 population genetics. *Genetics* **162**, 2025–2035 (2002).
- 844 129. Paradis, E. Pegas: an R package for population genetics with an integrated–modular  
845 approach. *Bioinformatics* **26**, 419–420 (2010).
- 846 130. Prost, S. & Anderson, C. N. K. TempNet: a method to display statistical parsimony  
847 networks for heterochronous DNA sequence data. *Methods Ecol. Evol.* **2**, 663–667  
848 (2011).
- 849 131. Oksanen, J. *et al.* *vegan: Community Ecology Package*. (2009).
- 850 132. R Core Development Team. *R: A language and environment for statistical computing*.  
851 (2009).
- 852 133. Tajima, F. Statistical method for testing the neutral mutation hypothesis by DNA  
853 polymorphism. *Genetics* **123**, 585–595 (1989).
- 854 134. Fu, Y. X. & Li, W. H. Statistical tests of neutrality of mutations. *Genetics* **133**, 693–  
855 709 (1993).
- 856 135. Ramos-Onsins, S. E. & Rozas, J. Statistical properties of new neutrality tests against  
857 population growth. *Mol. Biol. Evol.* **19**, 2092–2100 (2002).
- 858

859 **Acknowledgments**

860 We are thankful to Jean-Michel Metivier (IRSN) for his help with GIS, to Yevgenii  
861 Gulyaichenko (Chernobyl Center, Slavutych, Ukraine) for his help in the field, to Andrii  
862 Maksymenko (Chernobyl Center, Slavutych, Ukraine) for the radionuclide assay of the  
863 samples, and to Julia Maklyuk and other staff of the Chernobyl Center (Slavutych, Ukraine)  
864 for the generic arrangement and logistic during the field work in Chernobyl. Field work in the  
865 Chernobyl Exclusion Zone was funded by EC EURATOM-60497 COMET project, Swedish  
866 Radiation Protection Agency-SSM (SSM2017-269 and SSM2018-2038) and Carl Tryggers  
867 Foundation (CT 16:344). Molecular analyses were funded by IRSN and the French NEEDS-  
868 Environnement grant. Radiation analyses were funded by Swedish Radiation Protection  
869 Agency-SSM (SSM2017-269 and SSM2018-2038). C. Car benefited of an IRSN doctoral  
870 fellowship. P. Burraco was supported by a Carl Tryggers Foundation project CT 16:344 and  
871 by a Marie-Skłodowska-Curie individual fellowship (797879-METAGE project). G. Orizaola  
872 was supported by the Spanish Ministry of Science, Innovation and Universities “Ramón y  
873 Cajal” grant RYC-2016-20656.

874

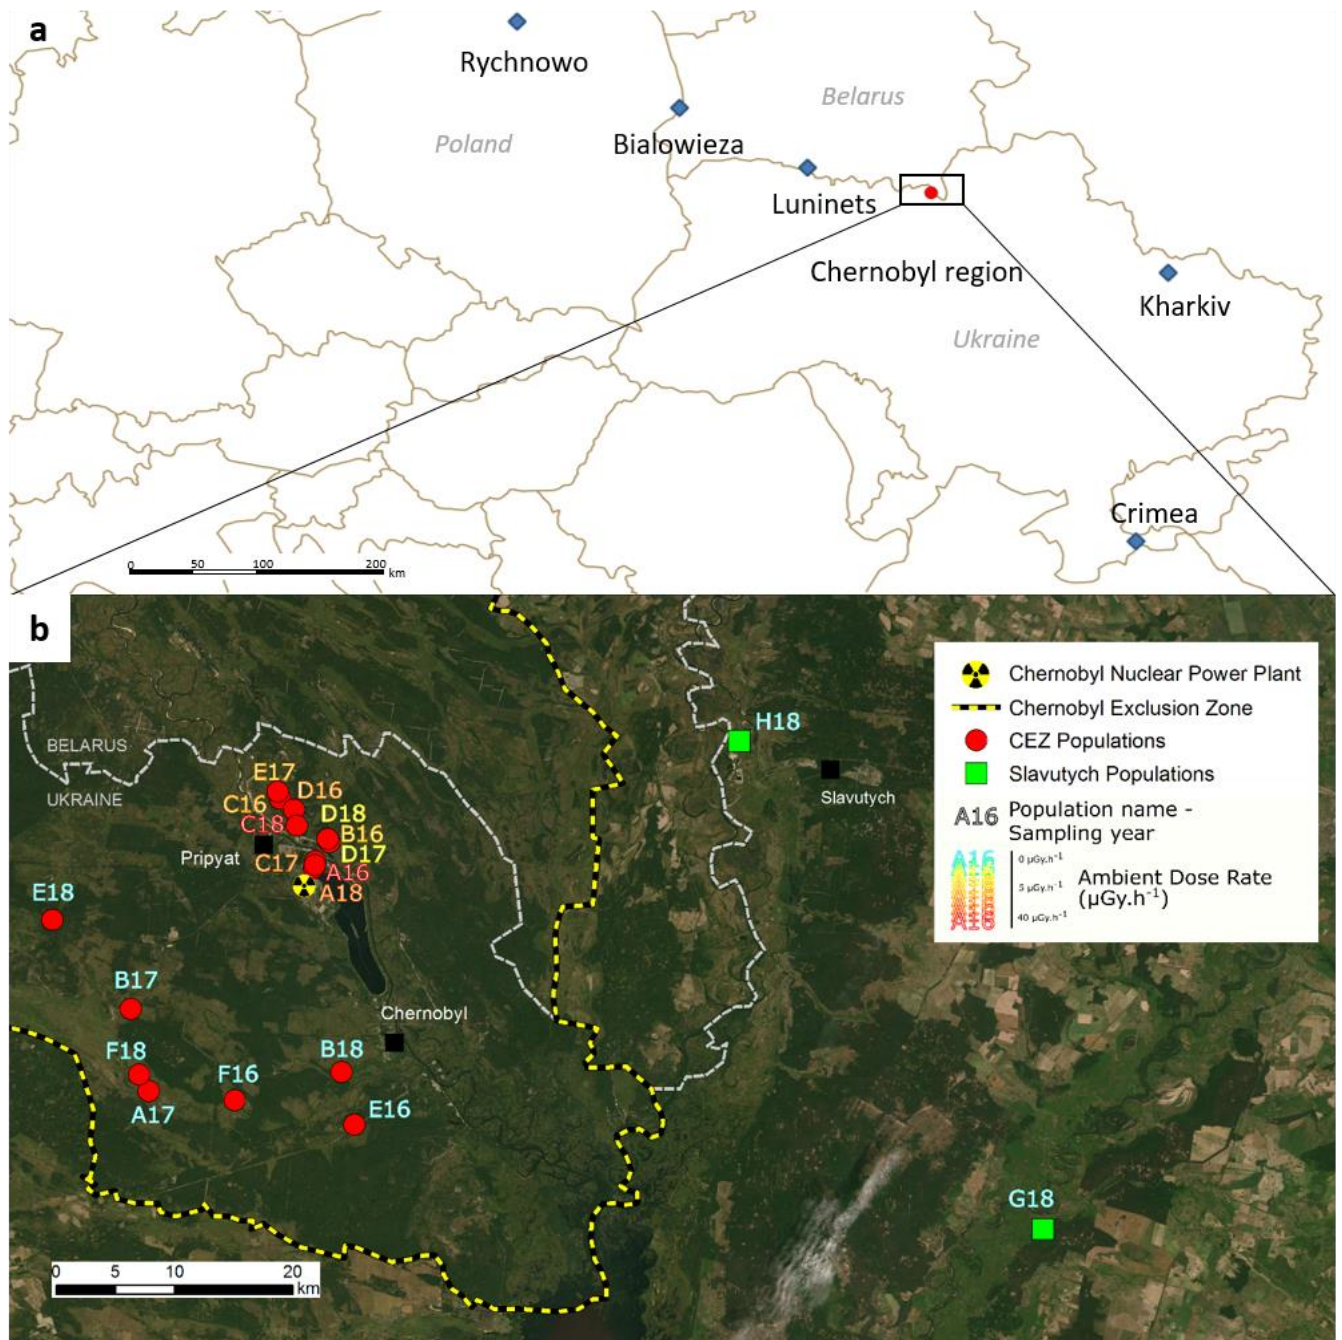

875

876 **Figure 1:** a. Location of European populations of Eastern tree frogs outside the Chernobyl  
877 region sampled by Dufresnes et al.<sup>62</sup> (blue diamonds) and the 19 populations sampled at the  
878 Chernobyl region (red circles). b. Map of the Chernobyl region and location of the 19  
879 populations sampled in 2016, 2017, 2018 in the CEZ and at Slavutych. The map was created  
880 with ArcGis v. 10.5. Source and service layer credits for satellite imagery: Esri, DigitalGlobe,  
881 GeoEye, Earthstar Geographics, CNES/Airbus DS, USDA, USGS, AeroGRID, IGN, and the  
882 GIS User Community.

1

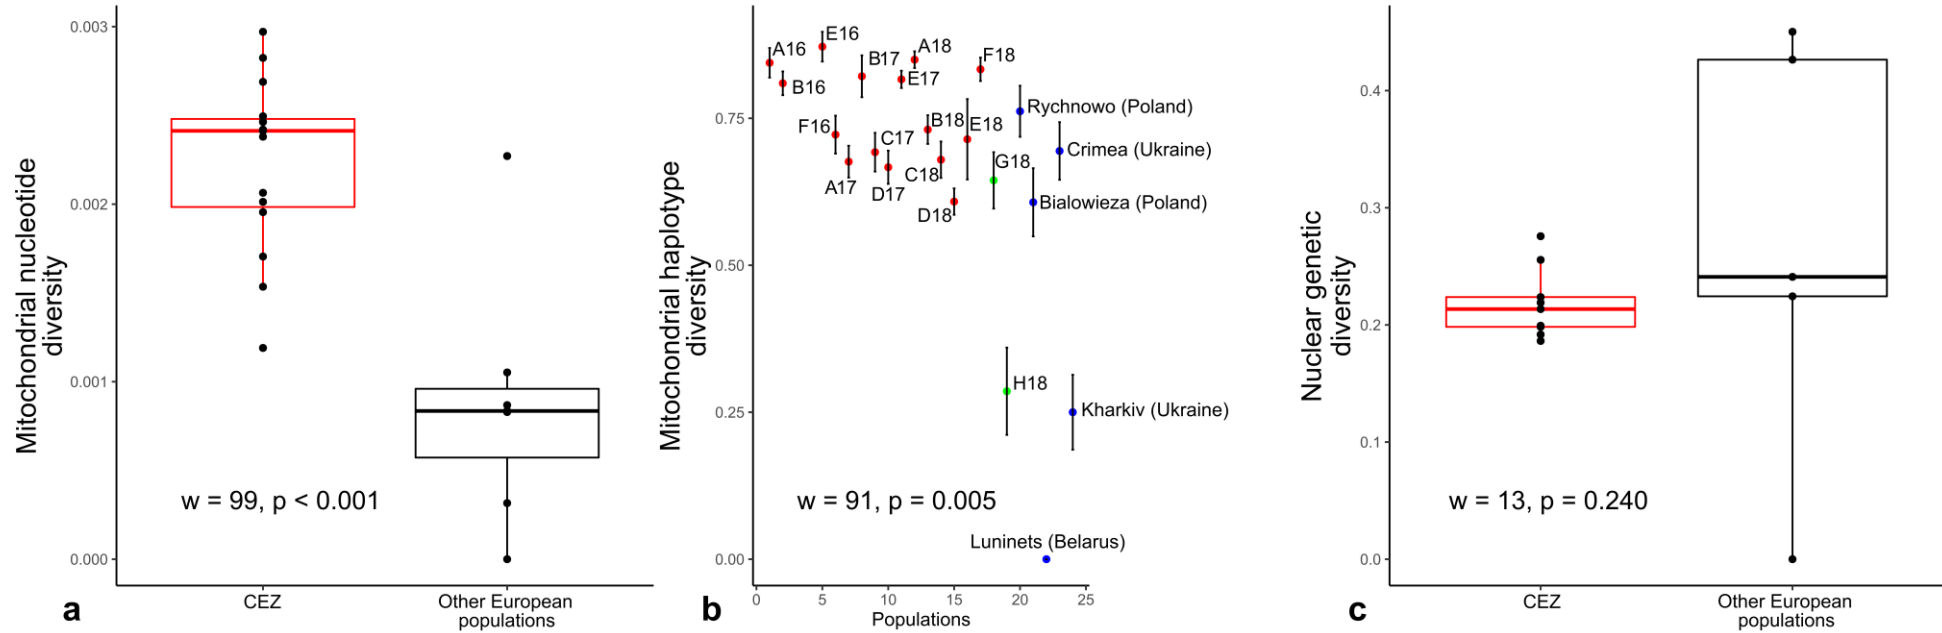

2

3 **Figure 2:** Comparison between genetic diversity estimates at the European level. **a.** Boxplot of mitochondrial nucleotide diversity (i.e. the  
4 probability that two randomly chosen nucleotides of the cytochrome b at a homolog position are different<sup>117,118</sup>) for CEZ (red) and other  
5 European populations (black). Genetic diversity is higher at the CEZ than at other European populations (Mann-Whitney,  $w = 99, p = 0.0004$ ).  
6 **b.** Mitochondrial haplotype diversity estimates (i.e. the probability that two randomly chosen haplotypes of the cytochrome b are different<sup>117</sup>)  $\pm$   
7 standard error for CEZ (red), populations from Slavutych (green) and sampled by Dufresnes et al. (blue)<sup>62</sup>. Genetic diversity is higher at the CEZ  
8 than at other European populations (Mann-Whitney,  $w = 91, p = 0.005$ ). **c.** Boxplot of nuclear genetic diversity estimated on the 21  
9 microsatellites markers<sup>117</sup> for CEZ (red) and other European populations (black). There are no significant differences between the genetic diversity  
10 of CEZ and other European populations (Mann-Whitney,  $w = 13, p = 0.240$ ).

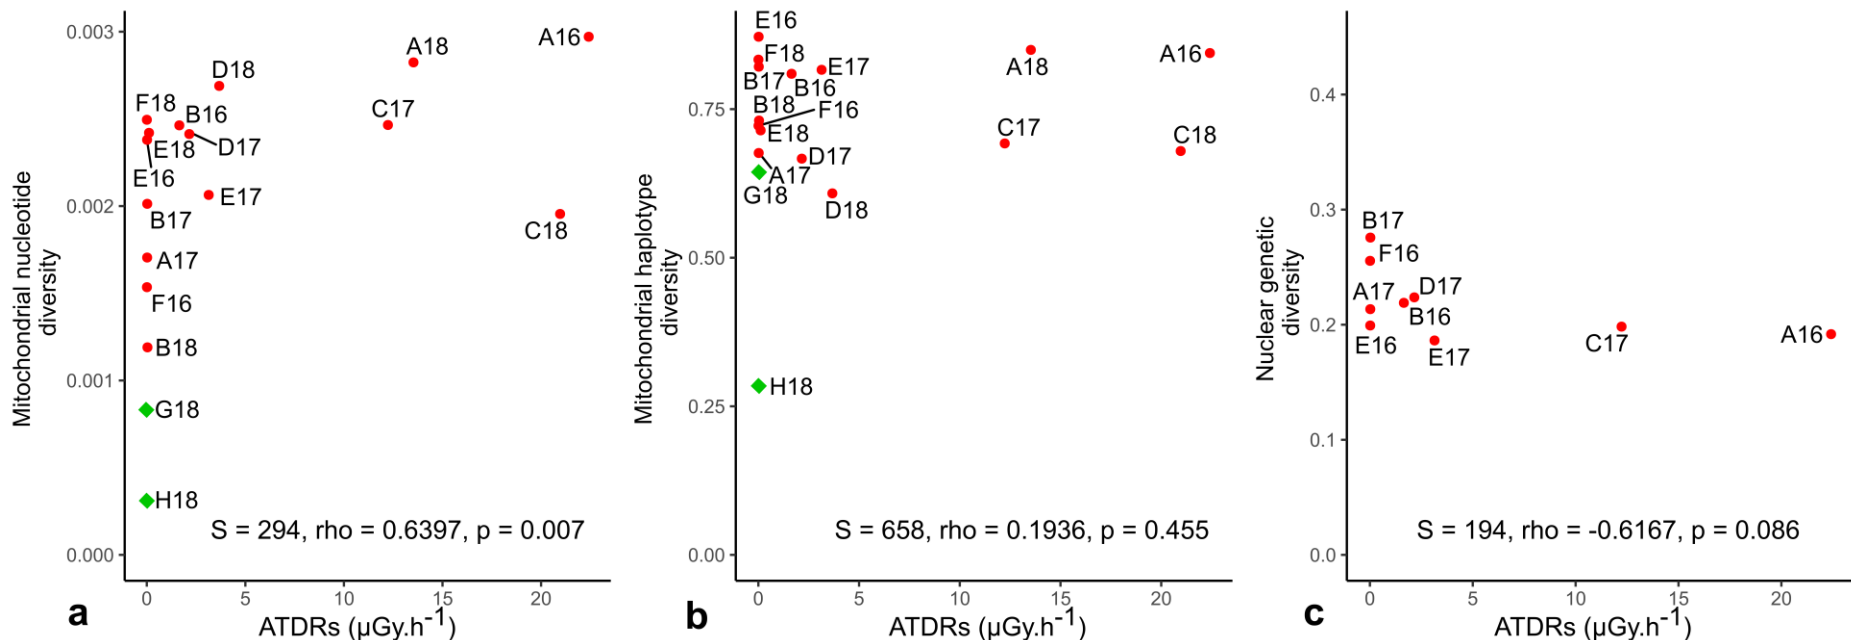

1

2

3 **Figure 3:** Correlation plots representing genetic diversity estimates on population-averaged dose rate (ATDR) in  $\mu\text{Gy}\cdot\text{h}^{-1}$ . Only populations of  
 4 the Chernobyl region (i.e. CEZ (red dots) and Slavutyich (green diamonds), Fig. 1b) with sample size  $> 7$  individuals were compared. **a.**  
 5 Mitochondrial nucleotide diversity estimates (i.e. the probability that two randomly chosen nucleotides of the cytochrome b at a homolog  
 6 position are different<sup>117,118</sup>) on ambient dose rate of the corresponding population. Nucleotide diversity is positively correlated to ATDR ( $S =$   
 7  $294$ ,  $\rho = 0.6397$ ,  $p = 0.007$ ). **b.** Mitochondrial haplotype diversity estimates (i.e. the probability that two randomly chosen haplotypes of the  
 8 cytochrome b are different<sup>117</sup>) on ATDR of the corresponding population. Haplotype diversity is not correlated to ATDR ( $S =$ ,  $658$   $\rho = 0.1936$ ,  
 9  $p = 0.455$ ). **c.** Nuclear genetic diversity ( $H_s$ ) estimated on the 21 microsatellites markers<sup>117</sup> on ATDR. Genetic diversity is not correlated to  
 10 ambient dose rate ( $S = 194$ ,  $\rho = -0.6167$ ,  $p = 0.086$ ).



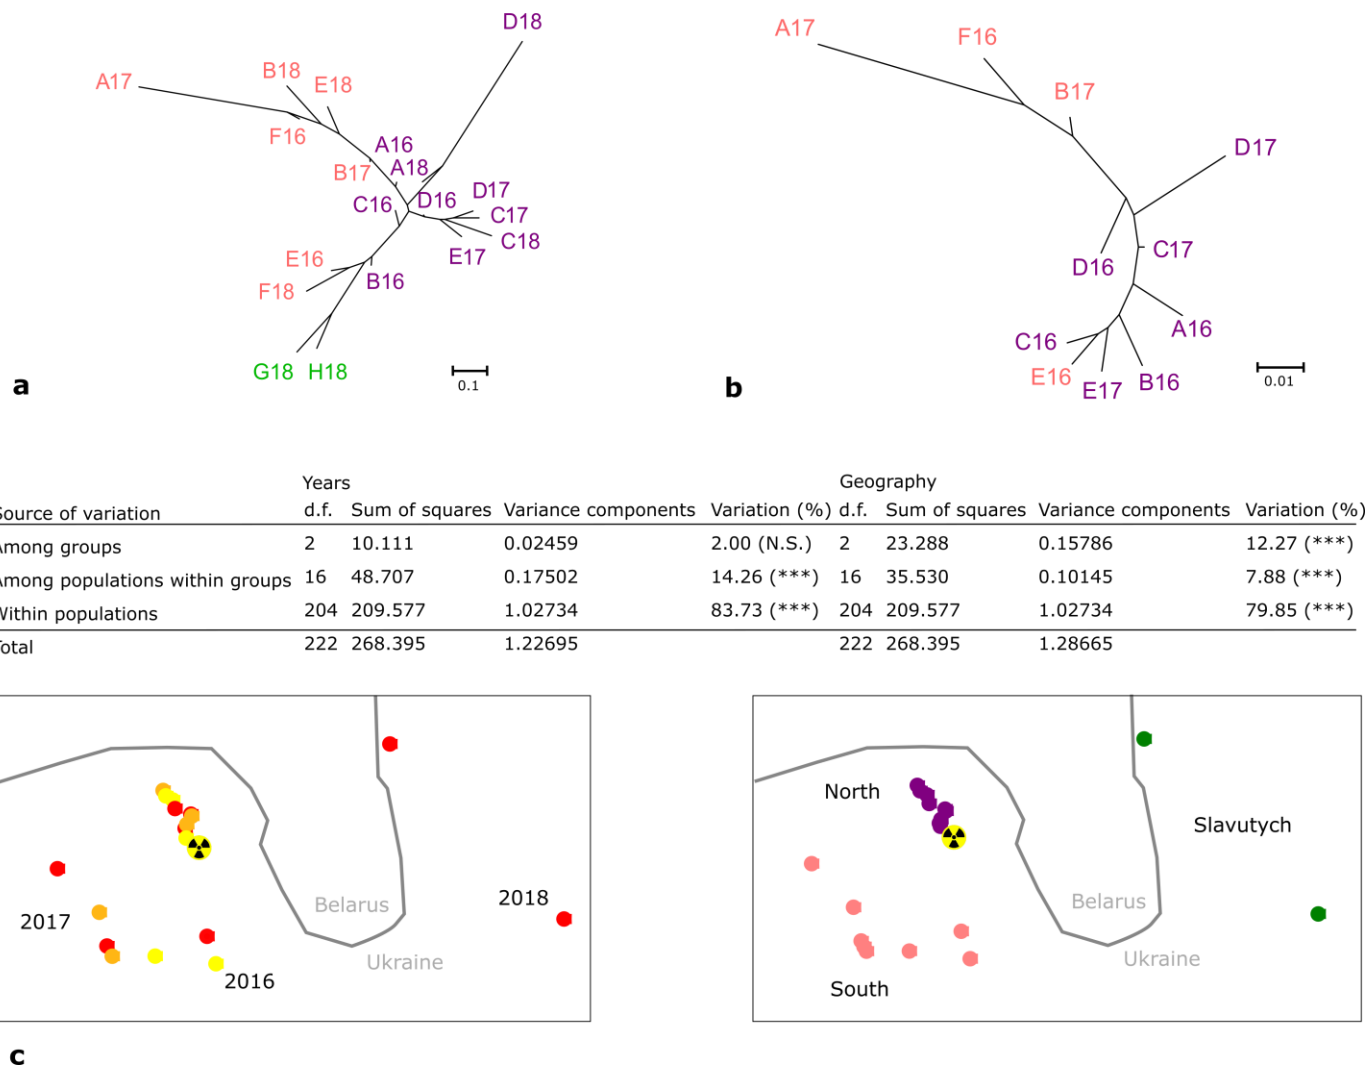

1

**c**

2

3 **Figure 4:** Genetic structure of the 19 populations of Eastern tree frogs from CEZ and  
4 Slavutych. Neighbor-joining tree were constructed from genetic distances calculated as  
5  $F_{st_{posi}}/(1-F_{st_{posi}})$  with  $F_{st_{posi}}$  equal to the addition of  $F_{st}$  and the absolute value of the lowest  
6  $F_{st}$  in order to avoid negative values and respect proportionality of pairwise  $F_{st}$  (see Methods  
7 for details). **a.** Neighbor Joining tree of CEZ (purple and pink) and Slavutych (green)  
8 populations from cytochrome b (mtDNA). **b.** Neighbor-Joining tree of CEZ populations (red)  
9 from microsatellites (nDNA). **c.** AMOVA analysis conducted on Year and Geographical  
10 groups on mtDNA. Stars represent significance calculated from Arlequin with 1023  
11 permutations<sup>121</sup> (\*\*\*: sign < 0.001). Year groups are 2016, 2017, 2018 (2016: yellow, 2017:  
12 orange, 2018: red) and geographical groups are north close to the Chernobyl Nuclear Power  
13 Plant (radiation warning symbol), south distant form the north and Slavutych (north: purple,  
14 south: pink, Slavutych: green).

1  
2  
3  
4  
5  
6  
7  
8  
9

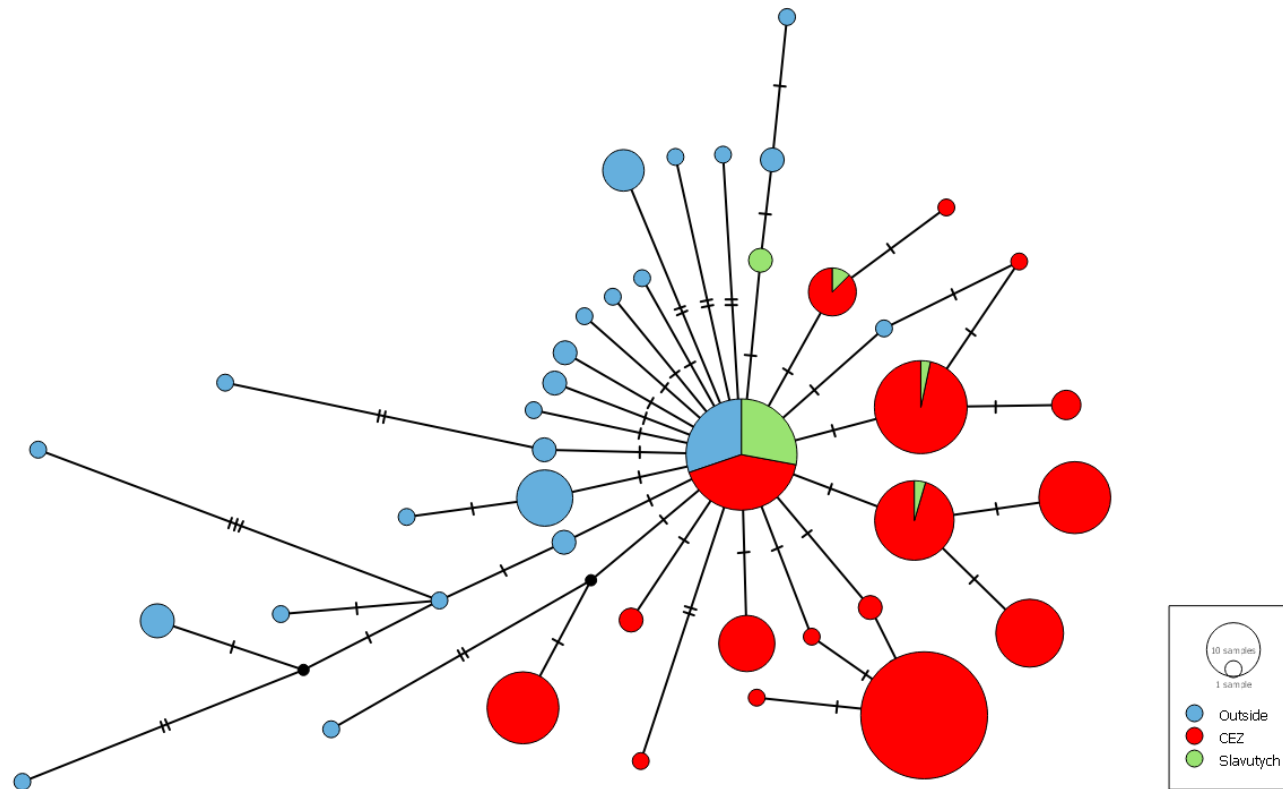

10 **Figure 5:** Haplotype network constructed for Eastern tree frog cytochrome b sequences from CEZ (red), Slavutych (green) populations, and  
11 European populations sampled by Dufresnes et al.<sup>62</sup> (blue) using the Median-Joining method<sup>126</sup> and POPART software<sup>127</sup>. Circles representing  
12 haplotypes, their diameter is proportional to the number of individuals and the number of horizontal bars between haplotypes representing the  
13 number of nucleotides differing between haplotypes. The network structure can inform on the demographic status of populations: when the  
14 central haplotype is large compared to the surrounding haplotypes and lot of one step rare haplotypes surround this central haplotype (e.g.  
15 Slavutych and European populations), the population is in demographic expansion; if the central haplotype is not mainly represented and if there  
16 are a lot of two or three steps large haplotypes, the population is at the equilibrium mutation/drift and is often formerly diversified (CEZ  
17 populations).

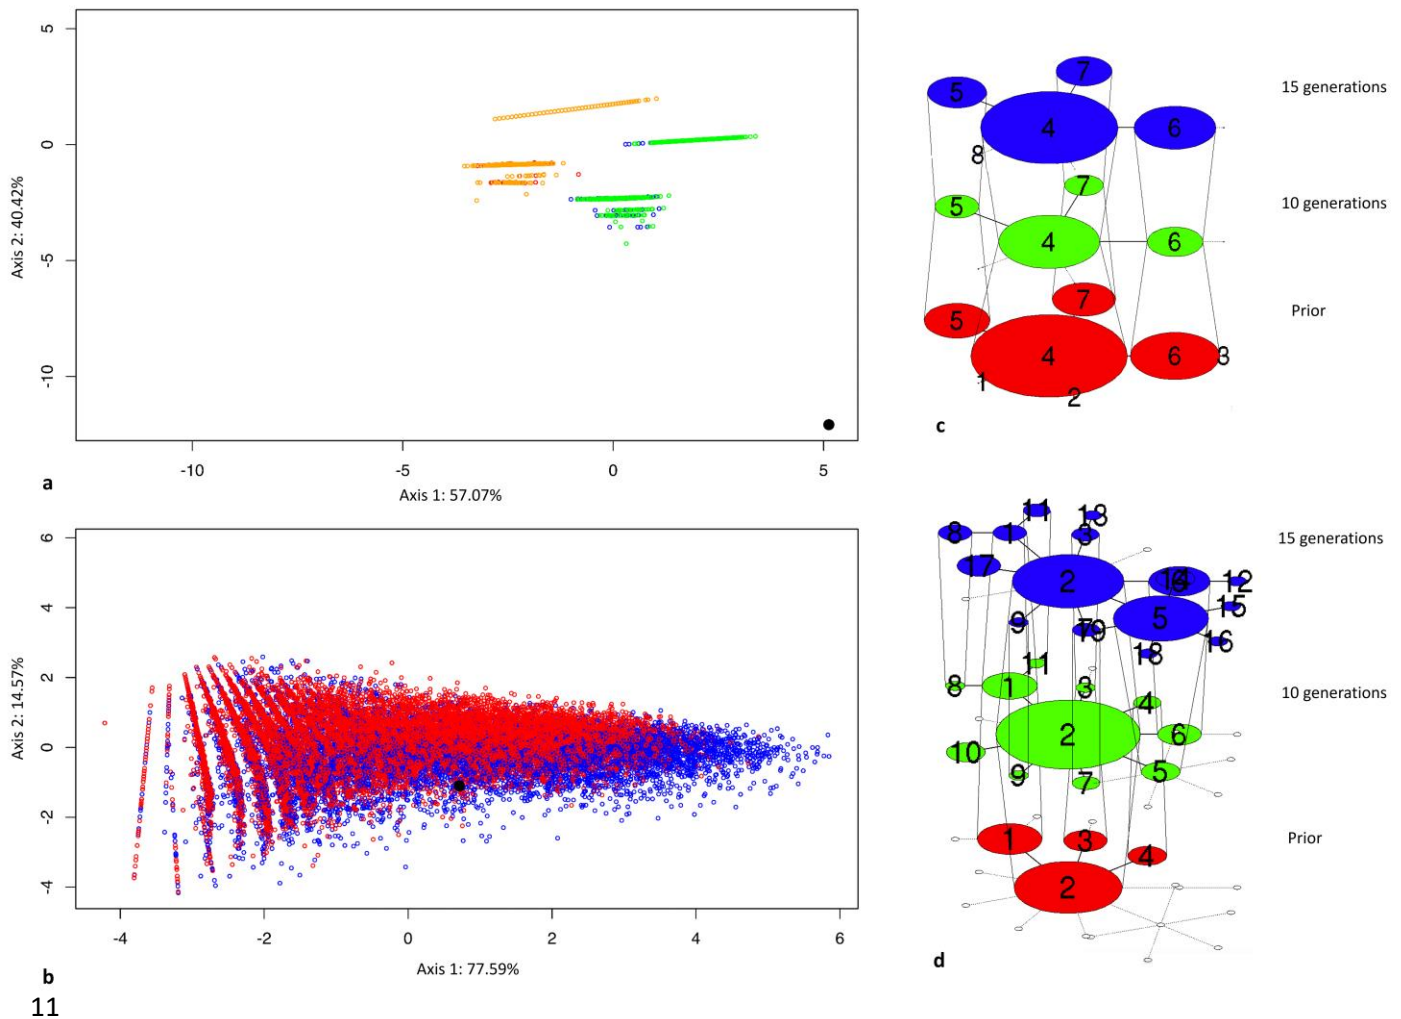

**Figure 6:** Mitochondrial haplotype network simulation. **a.** Representation of observed (black circle) and simulated (coloured open circles) data with a classical amphibian mitochondrial nucleotide substitution rate ( $20.37 \times 10^{-9}$  per nucleotide per generation), a population size sampled in a uniform distribution  $U(1000-5000)$ , and starting from the H18 (orange) or G18 (green) population haplotype frequencies on the two first axis of a PCA made on a set of haplotype network statistics. The observed data is not in the space of the simulated data. **b.** Representation of observed (black circle) and simulated (coloured circles) data with a high mitochondrial nucleotide substitution rate (0.005, 0.01, 0.02, 0.04, 0.06, 0.08) and small population size (sampled in a uniform distribution  $U(50,100)$ ,  $U(100,200)$ , or  $U(200,300)$ ) for 10 (red) and 15 (blue) generations on the two first axis of a PCA made on a set of haplotype network statistics. The observed data is in the space of the simulated data. **c.** One example of haplotype network evolutionary scenario of a simulated population starting from G18 population haplotype frequencies as prior with a classical amphibian substitution rate and populations sizes in the range of uniform distribution  $U(1000-5000)$ . **d.** One example of haplotype network evolutionary scenario of a simulated population starting from G18 population haplotype frequencies as prior with a high substitution rate (0.04) and a maximal effective size of 100 (for prior (red) and 10 (green) and 15 (blue) generations after the Chernobyl nuclear power plant accident).

30
